# Supplementary material for: Insight into the deprotonation at the half-equivalence point of (thio)amido-benzimidazoles in the presence of anions
Source: Royal Society of Chemistry journal article supplement (doi:10.1039/c7ob01704a), 2017-01-01
Supplement: c7ob01704a1.pdf [file c7ob01704a1.pdf]

## **Insight into the Deprotonation at the Half-Equivalence for (Thio)Amido–Benzimidazoles in the presence of Anions**

Sylvain Koeller,<sup>[a]</sup> Marie-Hélène Lescure,<sup>[a]</sup> Clotilde Davies,<sup>[a]</sup> Jean-Pierre  
Desvergne,<sup>[a]</sup> Stéphane Massip,<sup>[b]</sup> Brigitte Bibal\*<sup>[a]</sup>

### **Contents**

|                                                                               |     |
|-------------------------------------------------------------------------------|-----|
| Details of X-ray crystal structures                                           | S1  |
| UV–Visible Titrations between compounds <b>1–2</b> and anions                 | S20 |
| <sup>1</sup> H NMR monitoring of compounds <b>1–2</b> in presence of fluoride | S33 |
| References                                                                    | S38 |

## Details of the X-ray crystal structures

Crystallographic data of all compounds were collected with a MM007 R-Axis Rapid Rigaku diffractometer with rotating anode and monochromatic Cu-K $\alpha$  radiation ( $\lambda = 1.54187 \text{ \AA}$ ) and a curved image plate as detector.

The unit cell determination and data reduction were performed using the Crystal Clear program suite<sup>1</sup> on the full set of data. The structure was solved by direct methods and refined using Shelx suite of programs<sup>2</sup> in the integrated WinGX system<sup>3</sup>. The positions of most of the H atoms were deduced from coordinates of the non-H atoms and confirmed by Fourier synthesis. They were included for structure factor calculations but not refined. The non-H atoms were refined with anisotropic temperature parameters. The coordinates of some H atoms brought by nitrogen atoms were refined.

Figures were obtained using Mercury 3.8 software. All crystallographic data have been deposited in the Cambridge Crystallographic Data Centre. The CCDC number is indicated in the corresponding table of crystallographic data.

These crystallographic data have benefited from the facilities and expertises of the Biophysical and Structural Chemistry platform (BPCS) at IECB, CNRS UMS3033, Inserm US001, Bordeaux University,

<http://www.iecb.ubordeaux.fr/index.php/fr/plateformestecnologiques>

Compounds **1a–b** and **2a–b** were synthesized according to the previous reported procedure.<sup>[4]</sup> All tetrabutylammoniums salts were dried prior use. Acetonitrile was dried over calcium hydride and freshly distilled. UV-Visible absorption spectra were recorded at 298K using a Varian Cary 100 spectrophotometer and a quartz cuvette (path length: 1 cm).

Single crystals were grown by slow evaporation of a dichloromethane/ethanol solution containing HBD receptors **1–2** and TBAX (X: F, PhCO<sub>2</sub>) in a (1:1) stoichiometry.

**Table S1.** Crystal Data and structure Refinement for [(1a-H<sup>+</sup>).(nBu<sub>4</sub>N<sup>+</sup>)]

|                                   |                                                               |                |
|-----------------------------------|---------------------------------------------------------------|----------------|
| Empirical formula                 | C <sub>33</sub> H <sub>52</sub> N <sub>4</sub> O <sub>2</sub> |                |
| Formula weight                    | 536.79                                                        |                |
| Temperature                       | 213(2) K                                                      |                |
| Wavelength                        | 1.54180 Å                                                     |                |
| Crystal system                    | Monoclinic                                                    |                |
| Space group                       | C2/c                                                          |                |
| Unit cell dimensions              | a = 47.563(3) Å                                               | α = 90°.       |
|                                   | b = 7.5976(4) Å                                               | β = 94.075(4)° |
|                                   | c = 17.5514(8) Å                                              | γ = 90°        |
| Volume                            | 6326.4(6) Å <sup>3</sup>                                      |                |
| Z                                 | 8                                                             |                |
| Density (calculated)              | 1.127 Mg/m <sup>3</sup>                                       |                |
| Absorption coefficient            | 0.544 mm <sup>-1</sup>                                        |                |
| F(000)                            | 2352                                                          |                |
| Crystal size                      | 0.09 x 0.06 x 0.03 mm <sup>3</sup>                            |                |
| Theta range for data collection   | 7.02 to 71.99°.                                               |                |
| Index ranges                      | -58 ≤ h ≤ 58, -5 ≤ k ≤ 8, -21 ≤ l ≤ 21                        |                |
| Reflections collected             | 37061                                                         |                |
| Independent reflections           | 5894 [R(int) = 0.0328]                                        |                |
| Completeness to theta = 68.25°    | 96.9 %                                                        |                |
| Absorption correction             | Semi-empirical from equivalents                               |                |
| Max. and min. transmission        | 0.9839 and 0.9527                                             |                |
| Refinement method                 | Full-matrix least-squares on F <sup>2</sup>                   |                |
| Data / restraints / parameters    | 5894 / 0 / 360                                                |                |
| Goodness-of-fit on F <sup>2</sup> | 1.005                                                         |                |
| Final R indices [I > 2σ(I)]       | R1 = 0.0458, wR2 = 0.1232                                     |                |
| R indices (all data)              | R1 = 0.0578, wR2 = 0.1347                                     |                |
| Largest diff. peak and hole       | 0.216 and -0.160 e.Å <sup>-3</sup>                            |                |
| CCDC Number                       | 1545903                                                       |                |

**Table S2.** Crystal Data and structure Refinement for [(1b).(1b-H<sup>+</sup>).(nBu<sub>4</sub>N<sup>+</sup>)]

|                                   |                                                                                                  |
|-----------------------------------|--------------------------------------------------------------------------------------------------|
| Empirical formula                 | C50 H69 N7 O2 S2                                                                                 |
| Formula weight                    | 864.24                                                                                           |
| Temperature                       | 213(2) K                                                                                         |
| Wavelength                        | 1.54180 Å                                                                                        |
| Crystal system                    | Orthorhombic                                                                                     |
| Space group                       | Pna21                                                                                            |
| Unit cell dimensions              | a = 21.9302(15) Å      α = 90°<br>b = 8.3467(6) Å      β = 90°<br>c = 26.7797(14) Å      γ = 90° |
| Volume                            | 4901.9(5) Å <sup>3</sup>                                                                         |
| Z                                 | 4                                                                                                |
| Density (calculated)              | 1.171 Mg/m <sup>3</sup>                                                                          |
| Absorption coefficient            | 1.330 mm <sup>-1</sup>                                                                           |
| F(000)                            | 1864                                                                                             |
| Crystal size                      | 0.10 x 0.06 x 0.04 mm <sup>3</sup>                                                               |
| Theta range for data collection   | 6.57 to 68.24°                                                                                   |
| Index ranges                      | -20 ≤ h ≤ 26, -9 ≤ k ≤ 9, -32 ≤ l ≤ 32                                                           |
| Reflections collected             | 47965                                                                                            |
| Independent reflections           | 8679 [R(int) = 0.0666]                                                                           |
| Completeness to theta = 68.24°    | 97.9 %                                                                                           |
| Absorption correction             | Semi-empirical from equivalents                                                                  |
| Max. and min. transmission        | 0.9487 and 0.8785                                                                                |
| Refinement method                 | Full-matrix least-squares on F <sup>2</sup>                                                      |
| Data / restraints / parameters    | 8679 / 3 / 560                                                                                   |
| Goodness-of-fit on F <sup>2</sup> | 1.026                                                                                            |
| Final R indices [I > 2σ(I)]       | R1 = 0.0590, wR2 = 0.1399                                                                        |
| R indices (all data)              | R1 = 0.0723, wR2 = 0.1535                                                                        |
| Absolute structure parameter      | 0.51(4)                                                                                          |
| Largest diff. peak and hole       | 0.499 and -0.239 e. Å <sup>3</sup>                                                               |
| CCDC Number                       | 1545901                                                                                          |

**Table S3.** Crystal Data and structure Refinement for **(1b–H<sup>+</sup>).(*n*Bu<sub>4</sub>N<sup>+</sup>)**

|                                   |                                             |                           |
|-----------------------------------|---------------------------------------------|---------------------------|
| Empirical formula                 | C33 H52 N4 O S                              |                           |
| Formula weight                    | 552.85                                      |                           |
| Temperature                       | 153(2) K                                    |                           |
| Wavelength                        | 1.54187 Å                                   |                           |
| Crystal system                    | Monoclinic                                  |                           |
| Space group                       | C2/c                                        |                           |
| Unit cell dimensions              | a = 46.4589(8) Å                            | $\alpha = 90^\circ$       |
|                                   | b = 7.76490(10) Å                           | $\beta = 93.435(7)^\circ$ |
|                                   | c = 18.0818(13) Å                           | $\gamma = 90^\circ$       |
| Volume                            | 6511.3(5) Å <sup>3</sup>                    |                           |
| Z                                 | 8                                           |                           |
| Density (calculated)              | 1.128 Mg/m <sup>3</sup>                     |                           |
| Absorption coefficient            | 1.102 mm <sup>-1</sup>                      |                           |
| F(000)                            | 2416                                        |                           |
| Crystal size                      | 0.20 x 0.12 x 0.05 mm <sup>3</sup>          |                           |
| Theta range for data collection   | 6.77 to 68.25°                              |                           |
| Index ranges                      | -55 ≤ h ≤ 50, -6 ≤ k ≤ 9, -21 ≤ l ≤ 21      |                           |
| Reflections collected             | 23276                                       |                           |
| Independent reflections           | 5861 [R(int) = 0.0393]                      |                           |
| Completeness to theta = 68.25°    | 98.1 %                                      |                           |
| Absorption correction             | Semi-empirical from equivalents             |                           |
| Max. and min. transmission        | 0.9470 and 0.8097                           |                           |
| Refinement method                 | Full-matrix least-squares on F <sup>2</sup> |                           |
| Data / restraints / parameters    | 5861 / 0 / 359                              |                           |
| Goodness-of-fit on F <sup>2</sup> | 1.017                                       |                           |
| Final R indices [I>2sigma(I)]     | R1 = 0.0459, wR2 = 0.1270                   |                           |
| R indices (all data)              | R1 = 0.0562, wR2 = 0.1462                   |                           |
| Extinction coefficient            | 0.00039(5)                                  |                           |
| Largest diff. peak and hole       | 0.210 and -0.244 e.Å <sup>-3</sup>          |                           |
| CCDC Number                       | 1545904                                     |                           |

**Table S4.** Crystal Data and structure Refinement for **(2a–H<sup>+</sup>).(*n*Bu<sub>4</sub>N<sup>+</sup>)**

|                                   |                                                                       |                 |
|-----------------------------------|-----------------------------------------------------------------------|-----------------|
| Empirical formula                 | C <sub>26</sub> H <sub>30.50</sub> F <sub>6</sub> N <sub>3.50</sub> O |                 |
| Formula weight                    | 522.04                                                                |                 |
| Temperature                       | 153(2) K                                                              |                 |
| Wavelength                        | 1.54187 Å                                                             |                 |
| Crystal system                    | Monoclinic                                                            |                 |
| Space group                       | P2/n                                                                  |                 |
| Unit cell dimensions              | a = 10.42800(10) Å                                                    | α = 90°         |
|                                   | b = 8.66040(10) Å                                                     | β = 99.054(6) ° |
|                                   | c = 30.374(2) Å                                                       | γ = 90°         |
| Volume                            | 2708.94(18) Å <sup>3</sup>                                            |                 |
| Z                                 | 4                                                                     |                 |
| Density (calculated)              | 1.280 Mg/m <sup>3</sup>                                               |                 |
| Absorption coefficient            | 0.924 mm <sup>-1</sup>                                                |                 |
| F(000)                            | 1092                                                                  |                 |
| Crystal size                      | 0.20 x 0.15 x 0.04 mm <sup>3</sup>                                    |                 |
| Theta range for data collection   | 6.64 to 70.08°                                                        |                 |
| Index ranges                      | -12 ≤ h ≤ 8, -10 ≤ k ≤ 9, -36 ≤ l ≤ 36                                |                 |
| Reflections collected             | 22353                                                                 |                 |
| Independent reflections           | 5100 [R(int) = 0.0237]                                                |                 |
| Completeness to theta = 70.08°    | 98.6 %                                                                |                 |
| Absorption correction             | Semi-empirical from equivalents                                       |                 |
| Max. and min. transmission        | 0.9640 and 0.8368                                                     |                 |
| Refinement method                 | Full-matrix least-squares on F <sup>2</sup>                           |                 |
| Data / restraints / parameters    | 5100 / 57 / 415                                                       |                 |
| Goodness-of-fit on F <sup>2</sup> | 1.017                                                                 |                 |
| Final R indices [I > 2σ(I)]       | R1 = 0.0543, wR2 = 0.1391                                             |                 |
| R indices (all data)              | R1 = 0.0787, wR2 = 0.1607                                             |                 |
| Extinction coefficient            | 0.0044(4)                                                             |                 |
| Largest diff. peak and hole       | 0.295 and -0.180 e. Å <sup>-3</sup>                                   |                 |
| CCDC Number                       | 1545905                                                               |                 |

**Table S5.** Crystal Data and structure Refinement for **(2a).MeOH**

|                                   |                                                                              |                           |
|-----------------------------------|------------------------------------------------------------------------------|---------------------------|
| Empirical formula                 | C <sub>19</sub> H <sub>17</sub> F <sub>6</sub> N <sub>3</sub> O <sub>2</sub> |                           |
| Formula weight                    | 433.36                                                                       |                           |
| Temperature                       | 293(2) K                                                                     |                           |
| Wavelength                        | 1.54187 Å                                                                    |                           |
| Crystal system                    | Monoclinic                                                                   |                           |
| Space group                       | P2 <sub>1</sub> /n                                                           |                           |
| Unit cell dimensions              | a = 4.8277(2) Å                                                              | $\alpha = 90^\circ$       |
|                                   | b = 24.7394(9) Å                                                             | $\beta = 94.129(2)^\circ$ |
|                                   | c = 16.4158(9) Å                                                             | $\gamma = 90^\circ$       |
| Volume                            | 1955.52(15) Å <sup>3</sup>                                                   |                           |
| Z                                 | 4                                                                            |                           |
| Density (calculated)              | 1.472 Mg/m <sup>3</sup>                                                      |                           |
| Absorption coefficient            | 1.193 mm <sup>-1</sup>                                                       |                           |
| F(000)                            | 888                                                                          |                           |
| Crystal size                      | 0.20 x 0.08 x 0.05 mm <sup>3</sup>                                           |                           |
| Theta range for data collection   | 3.24 to 72.49°                                                               |                           |
| Index ranges                      | -3 ≤ h ≤ 5, -30 ≤ k ≤ 30, -17 ≤ l ≤ 20                                       |                           |
| Reflections collected             | 10772                                                                        |                           |
| Independent reflections           | 3513 [R(int) = 0.0525]                                                       |                           |
| Completeness to theta = 72.49°    | 91.1 %                                                                       |                           |
| Absorption correction             | Semi-empirical from equivalents                                              |                           |
| Max. and min. transmission        | 0.9427 and 0.7963                                                            |                           |
| Refinement method                 | Full-matrix least-squares on F <sup>2</sup>                                  |                           |
| Data / restraints / parameters    | 3513 / 3 / 340                                                               |                           |
| Goodness-of-fit on F <sup>2</sup> | 1.026                                                                        |                           |
| Final R indices [I > 2sigma(I)]   | R1 = 0.0713, wR2 = 0.1578                                                    |                           |
| R indices (all data)              | R1 = 0.1050, wR2 = 0.1823                                                    |                           |
| Extinction coefficient            | 0.0024(3)                                                                    |                           |
| Largest diff. peak and hole       | 0.238 and -0.168 e.Å <sup>-3</sup>                                           |                           |
| CCDC Number                       | 1545902                                                                      |                           |

**Table S6.** Crystal Data and structure Refinement for **(2a)<sub>2</sub>**

|                                   |                                                                               |                 |
|-----------------------------------|-------------------------------------------------------------------------------|-----------------|
| Empirical formula                 | C <sub>36</sub> H <sub>26</sub> F <sub>12</sub> N <sub>6</sub> O <sub>2</sub> |                 |
| Formula weight                    | 802.63                                                                        |                 |
| Temperature                       | 253(2) K                                                                      |                 |
| Wavelength                        | 1.54187 Å                                                                     |                 |
| Crystal system                    | Triclinic                                                                     |                 |
| Space group                       | P-1                                                                           |                 |
| Unit cell dimensions              | a = 9.8669(12) Å                                                              | α = 94.509(5)°  |
|                                   | b = 11.6783(13) Å                                                             | β = 90.153(4) ° |
|                                   | c = 16.7989(19) Å                                                             | γ = 99.505(5) ° |
| Volume                            | 1903.0(4) Å <sup>3</sup>                                                      |                 |
| Z                                 | 2                                                                             |                 |
| Density (calculated)              | 1.401 Mg/m <sup>3</sup>                                                       |                 |
| Absorption coefficient            | 1.143 mm <sup>-1</sup>                                                        |                 |
| F(000)                            | 816                                                                           |                 |
| Crystal size                      | 0.20 x 0.15 x 0.04 mm <sup>3</sup>                                            |                 |
| Theta range for data collection   | 2.64 to 72.06°                                                                |                 |
| Index ranges                      | -7 ≤ h ≤ 11, -14 ≤ k ≤ 14, -20 ≤ l ≤ 20                                       |                 |
| Reflections collected             | 27444                                                                         |                 |
| Independent reflections           | 7106 [R(int) = 0.0229]                                                        |                 |
| Completeness to theta = 72.06°    | 95.0 %                                                                        |                 |
| Absorption correction             | Semi-empirical from equivalents                                               |                 |
| Max. and min. transmission        | 0.9557 and 0.8036                                                             |                 |
| Refinement method                 | Full-matrix least-squares on F <sup>2</sup>                                   |                 |
| Data / restraints / parameters    | 7106 / 24 / 537                                                               |                 |
| Goodness-of-fit on F <sup>2</sup> | 1.027                                                                         |                 |
| Final R indices [I > 2σ(I)]       | R1 = 0.0756, wR2 = 0.1770                                                     |                 |
| R indices (all data)              | R1 = 0.0962, wR2 = 0.1920                                                     |                 |
| Extinction coefficient            | 0.0060(3)                                                                     |                 |
| Largest diff. peak and hole       | 0.800 and -0.489 e.Å <sup>-3</sup>                                            |                 |
| CCDC Number                       | 1545906                                                                       |                 |



**Table S7.** Crystal Data and structure Refinement for **(2b).(2b-H<sup>+</sup>).(nBu<sub>4</sub>N<sup>+</sup>)**

|                                   |                                                                               |                  |
|-----------------------------------|-------------------------------------------------------------------------------|------------------|
| Empirical formula                 | C <sub>53</sub> H <sub>65</sub> F <sub>12</sub> N <sub>7</sub> O <sub>2</sub> |                  |
| Formula weight                    | 1108.24                                                                       |                  |
| Temperature                       | 293(2) K                                                                      |                  |
| Wavelength                        | 1.54187 Å                                                                     |                  |
| Crystal system                    | Monoclinic                                                                    |                  |
| Space group                       | C2                                                                            |                  |
| Unit cell dimensions              | a = 30.8271(17) Å                                                             | α = 90°          |
|                                   | b = 8.5867(4) Å                                                               | β = 108.296(3) ° |
|                                   | c = 22.1213(16) Å                                                             | γ = 90°          |
| Volume                            | 5559.6(6) Å <sup>3</sup>                                                      |                  |
| Z                                 | 4                                                                             |                  |
| Density (calculated)              | 1.324 Mg/m <sup>3</sup>                                                       |                  |
| Absorption coefficient            | 1.600 mm <sup>-1</sup>                                                        |                  |
| F(000)                            | 2320                                                                          |                  |
| Crystal size                      | 0.12 x 0.08 x 0.02 mm <sup>3</sup>                                            |                  |
| Theta range for data collection   | 6.53 to 68.22°                                                                |                  |
| Index ranges                      | -36 ≤ h ≤ 36, -9 ≤ k ≤ 10, -20 ≤ l ≤ 26                                       |                  |
| Reflections collected             | 12807                                                                         |                  |
| Independent reflections           | 7503 [R(int) = 0.0465]                                                        |                  |
| Completeness to theta = 68.22°    | 96.0 %                                                                        |                  |
| Absorption correction             | Semi-empirical from equivalents                                               |                  |
| Max. and min. transmission        | 0.9687 and 0.8312                                                             |                  |
| Refinement method                 | Full-matrix least-squares on F <sup>2</sup>                                   |                  |
| Data / restraints / parameters    | 7503 / 30 / 692                                                               |                  |
| Goodness-of-fit on F <sup>2</sup> | 1.046                                                                         |                  |
| Final R indices [I > 2σ(I)]       | R1 = 0.0703, wR2 = 0.1652                                                     |                  |
| R indices (all data)              | R1 = 0.1022, wR2 = 0.1751                                                     |                  |
| Largest diff. peak and hole       | 0.270 and -0.232 e.Å <sup>-3</sup>                                            |                  |
| CCDC Number                       | 1545907                                                                       |                  |

**Table S8-A.** Selected Hydrogen Bond length (Å) and angles (°) in monocystal of (**1a** – **H<sup>+</sup>**).*n*Bu<sub>4</sub>N<sup>+</sup>, obtained in the presence of *n*Bu<sub>4</sub>N<sup>+</sup>.F<sup>–</sup>.

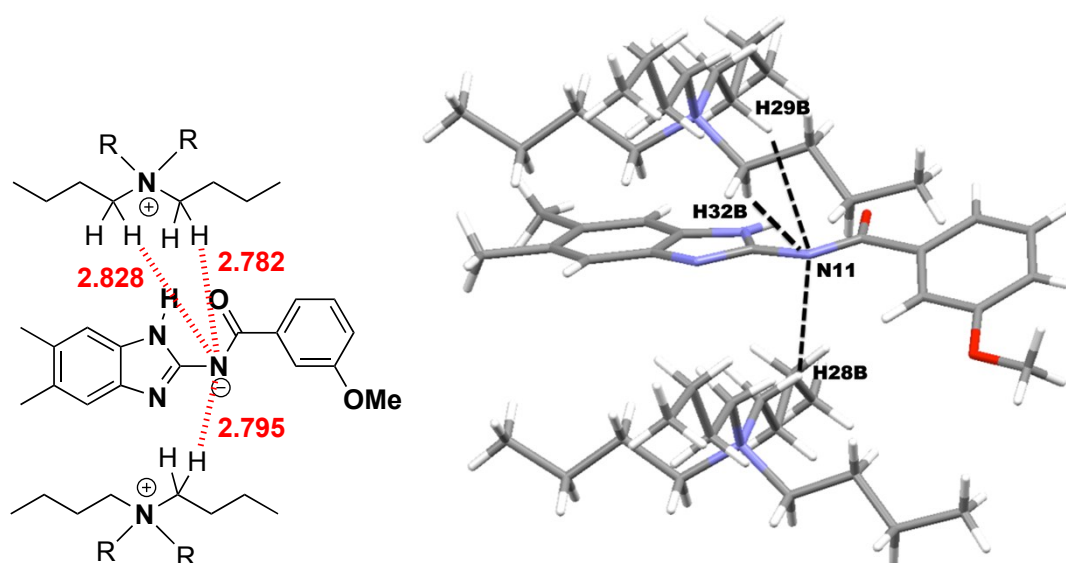

R: *n*-Bu

Only one contact was seen between (**1a**–H<sup>+</sup>) compounds, through the two OMe groups. The CH<sub>3</sub>–O...H–C distance is 2.745 Å (O7–H8B).

The other close contacts are between one molecule of (**1a**–H<sup>+</sup>) and several *n*Bu<sub>4</sub>N<sup>+</sup> cations.

|                                                                        | Intramolecular<br>H-bond<br>NH...O=C | Intermolecular<br>N <sup>–</sup> ...H–C ( <i>n</i> Bu <sub>4</sub> N <sup>+</sup> )                                         | Other Short contacts<br>( <b>1a</b> –H <sup>+</sup> )...H–C<br>( <i>n</i> Bu <sub>4</sub> N <sup>+</sup> )                                                                                                   |
|------------------------------------------------------------------------|--------------------------------------|-----------------------------------------------------------------------------------------------------------------------------|--------------------------------------------------------------------------------------------------------------------------------------------------------------------------------------------------------------|
| ( <b>1a</b> –H <sup>+</sup> ). <i>n</i> Bu <sub>4</sub> N <sup>+</sup> | 2.080<br>(<N13H13O10>:<br>118.99°)   | 2.795 (N11–H28B,<br>130.27°), 2.782 (N11–<br>H32B, 155.61°), 2.828<br>(N11–H29B, 144.41°),<br>3.016 (N11–H24A,<br>124.81°), | <u>N</u> <sub>benzimidazole</sub> ... <u>H</u> –C:<br>2.442 (N16–H24B),<br>2.658 (N16–H36A),<br>2.762 (N16–H28A),<br>2.800 (N16–H32B),<br>2.906 (N16–H29A)<br>and Multiple contacts<br>between 2.8 and 3.2 Å |

**Table S8-B.** Selected Hydrogen Bond length (Å) and angles (°) in monocrystal of **(1b – H<sup>+</sup>).***n*Bu<sub>4</sub>N<sup>+</sup>, obtained in the presence of *n*Bu<sub>4</sub>N<sup>+</sup>.F<sup>–</sup>.

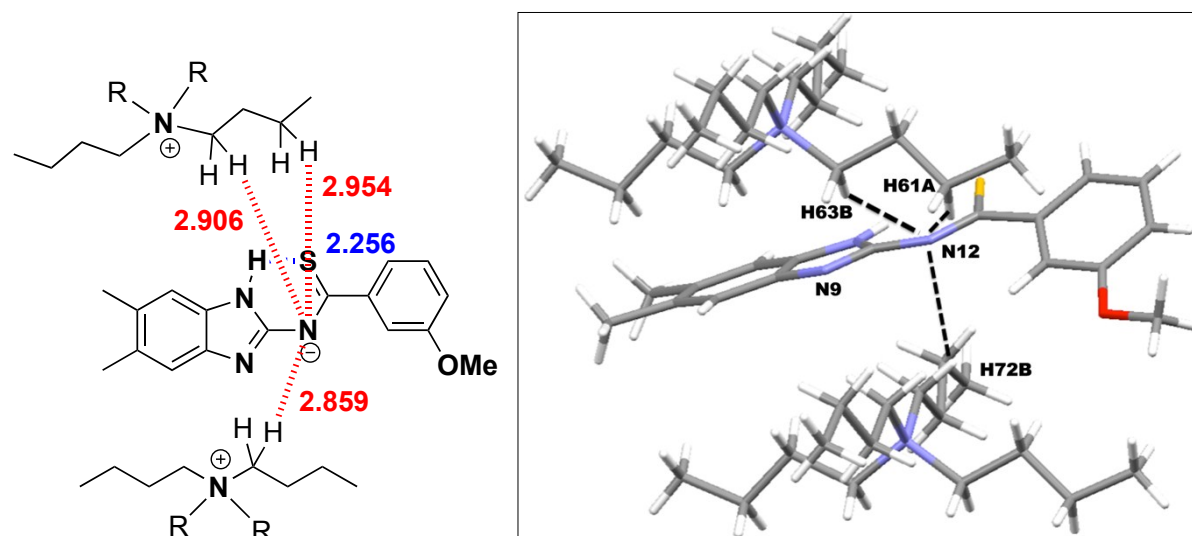

R: *n*-Bu

|                                                                    | Intramolecular distance<br><u>NH</u> ... <u>S=C</u> | Intermolecular<br><u>N</u> ... <u>H-C</u> ( <i>n</i> Bu <sub>4</sub> N <sup>+</sup> ) | Other Short contacts<br>(1a-H <sup>+</sup> )...H-C ( <i>n</i> Bu <sub>4</sub> N <sup>+</sup> )                                               |
|--------------------------------------------------------------------|-----------------------------------------------------|---------------------------------------------------------------------------------------|----------------------------------------------------------------------------------------------------------------------------------------------|
| <b>(1b-H<sup>+</sup>).</b> <i>n</i> Bu <sub>4</sub> N <sup>+</sup> | 2.256<br>(<N7-H7-S14>:<br>135.17°)                  | 2.859 (N12-H72B), 2.906<br>(N12-H63B), 2.954 (N12-<br>H61A)                           | <u>N</u> <sub>benzimidazole</sub> ... <u>H-C</u> :<br>2.477 (N9-H73B), 2.694<br>(N9-H65B)<br>and Multiple contacts<br>between 2.8 and 3.2 Å. |

Only one contact was seen between **(1b-H<sup>+</sup>)** compounds, through the two OMe groups. The CH<sub>3</sub>-O...H-C distance is 2.685 Å (O21-H22A).

The other close contacts are between one molecule of **(1b-H<sup>+</sup>)** and several *n*Bu<sub>4</sub>N<sup>+</sup> cations.

**Table S8-C.** Selected Hydrogen Bond length (Å) and angles (°) in monocystal of **(2a – 0.5 H<sup>+</sup>)<sub>2</sub>·nBu<sub>4</sub>N<sup>+</sup>**, obtained in the presence of **nBu<sub>4</sub>N<sup>+</sup>·F<sup>-</sup>**

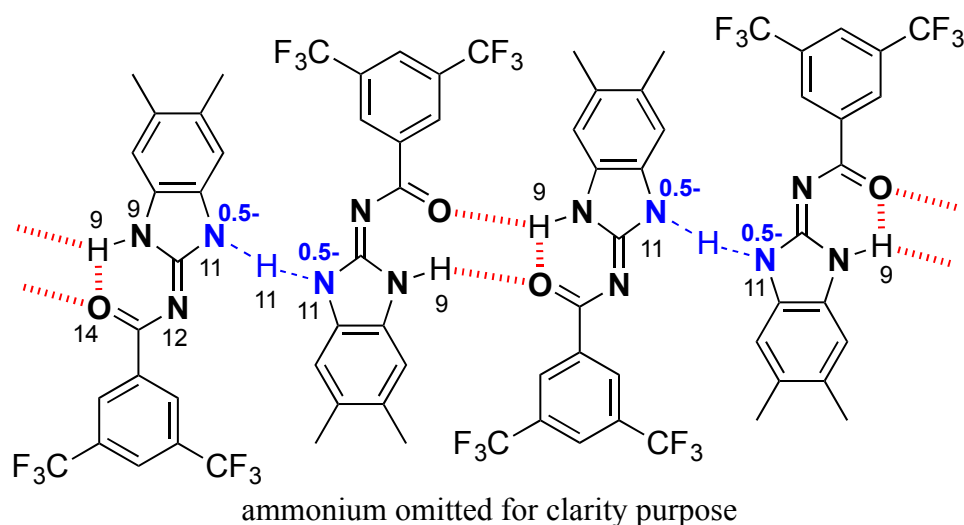

Compound **(2a – 0.5 H<sup>+</sup>)** is observed as its *N*-(1,3-dihydro-benzimidazol-2-ylidene) tautomer, as already reported.<sup>4</sup> Half-deprotonation was observed on N11 nitrogen. Then, in each dimer arrangement, one residual proton is shared by two N11 provided with a negative charge of – 0.5.

|                                                                       | Intramolecular distance<br><b>NH...O=C</b> | Interactions between<br><b>(2a – 0.5 H<sup>+</sup>)</b> molecules                                                                     | Other Short contacts<br><b>(2a–0.5H<sup>+</sup>)...H-C</b><br>( <i>n</i> Bu <sub>4</sub> N <sup>+</sup> )                                                     |
|-----------------------------------------------------------------------|--------------------------------------------|---------------------------------------------------------------------------------------------------------------------------------------|---------------------------------------------------------------------------------------------------------------------------------------------------------------|
| <b>(2a–0.5H<sup>+</sup>)<sub>2</sub>·nBu<sub>4</sub>N<sup>+</sup></b> | 2.139<br>(H9...O14)                        | H-bonding: 2.109<br>(H9...O14)<br>Half-deprotonation:<br>2.679<br>( <u>N11</u> <sup>0.5–</sup> ...H11... <u>N11</u> <sup>0.5–</sup> ) | Multiple contacts between<br>2.49 and 3.1 Å.<br>2.486 (O14...H56B),<br>2.733 (O14...H56A),<br>2.907 (N12...H54B),<br>2.917 (N9...H52B), 2.989<br>(C10...H58B) |

Each molecule **(2a – 0.5 H<sup>+</sup>)** is almost flat (angle C13N12C10N9 = -3.2°) and is tilted by 47.2° with the two surrounding ones.

In a zig-zag arrangement, molecules **(2a – 0.5 H<sup>+</sup>)** are interacting through two short hydrogen bonds with one molecule (d: 2.109 Å) and through a strong interaction N<sup>0.5–</sup>...H...N<sup>0.5–</sup> (distance between both nitrogen atoms: 2.679 Å) with the second one.

This alignment of amido-benzimidazoles is surrounded by an upper and a lower layer of **nBu<sub>4</sub>N<sup>+</sup>** cations in close contact (2.49-3.1 Å, see images below).

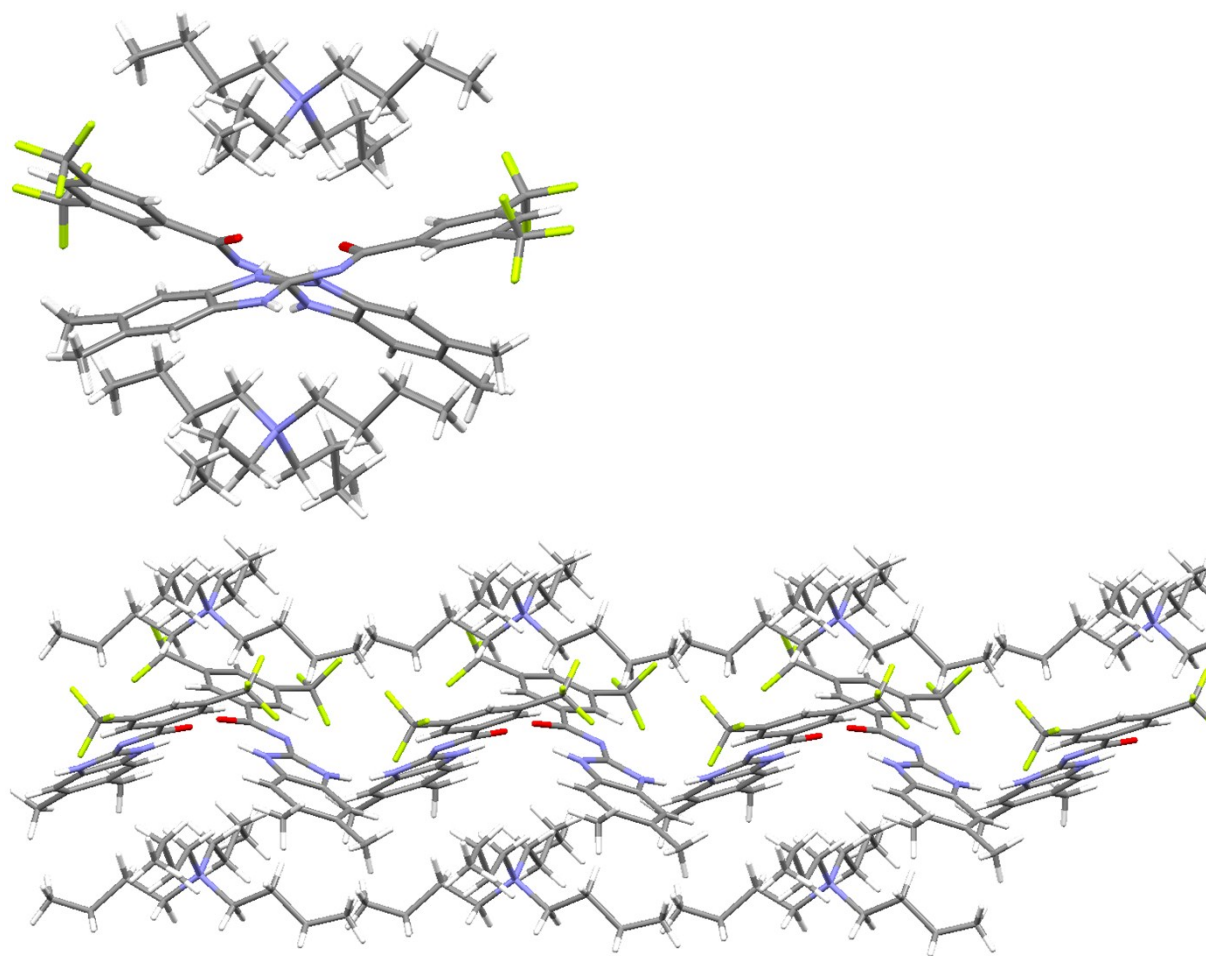

Views in the  $(2\mathbf{a} - 0.5 \text{H}^+)_2 \cdot n\text{Bu}_4\text{N}^+$  crystal. Top: face; down: side view.

**Table S8-D.** Selected Hydrogen Bond length (Å) and angles (°) in monocrystal of **2a**

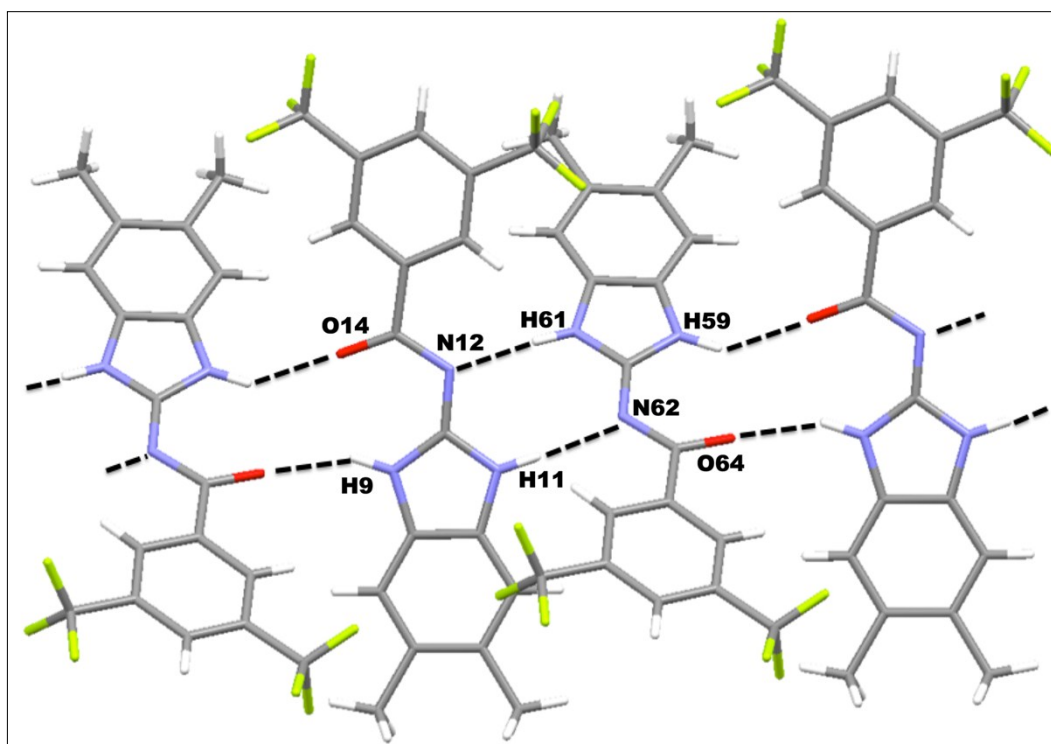

|                                                               | Intramolecular distance<br><b>NH...O=C</b>                                     | Intermolecular H-bond                                                                                                                                            | Short contacts                                                                                                                                                                                                                                                   |
|---------------------------------------------------------------|--------------------------------------------------------------------------------|------------------------------------------------------------------------------------------------------------------------------------------------------------------|------------------------------------------------------------------------------------------------------------------------------------------------------------------------------------------------------------------------------------------------------------------|
| <b>2a</b><br>(2 independent molecules <b>A</b> and <b>B</b> ) | A: 2.195<br><N11-H11-O14>:<br>115.48°<br>B: 2.203<br><N59-H59-O64>:<br>114.89° | 2.023 (N-H...N, N11-H11/N62, 170.25°),<br>2.032 (N-H...N, N61H61/N12, 173.33°)<br>2.087 (N-H...O, N59-H59/O14, 145.55°),<br>2.121 (N-H...O, N9-H9/O64, 145.18°). | <b>C-F...F-C</b> : 2.863 (F26-F73), 3.216 (F72-F77), 3.457 (F72-F78), 3.502 (F23-F26)<br>and <b>Pi-Pi stacking</b> between two fluorinated aromatics (inter-centroid distance: 3.993 Å) and between two 2,3-trimethylbenzene (inter-centroid distance: 3.898 Å). |

Each **2a** molecule (**A** or **B**) is almost planar and these two planes are tilted by ca. 47.77°. This X-shape arrangement is propagating along the same axis and interacts with the other ones through Pi-stacking between 3,5-(CF<sub>3</sub>)<sub>2</sub>-C<sub>6</sub>H<sub>3</sub> moieties or 2,3-trimethyl-benzene from benzimidazoles.

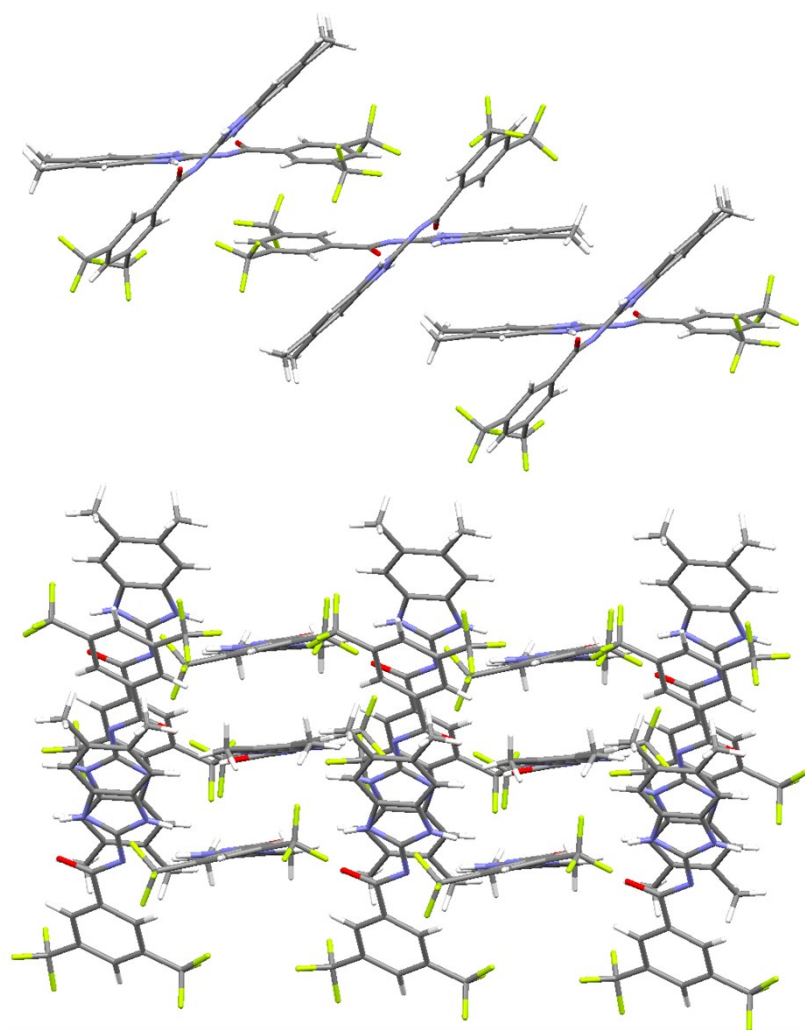

Views in the **2a** crystal. Top: face; down: side view.

**Table S8-E.** Selected Hydrogen Bond length (Å) and angles (°) in monocrystal of (2a.CH<sub>3</sub>OH)

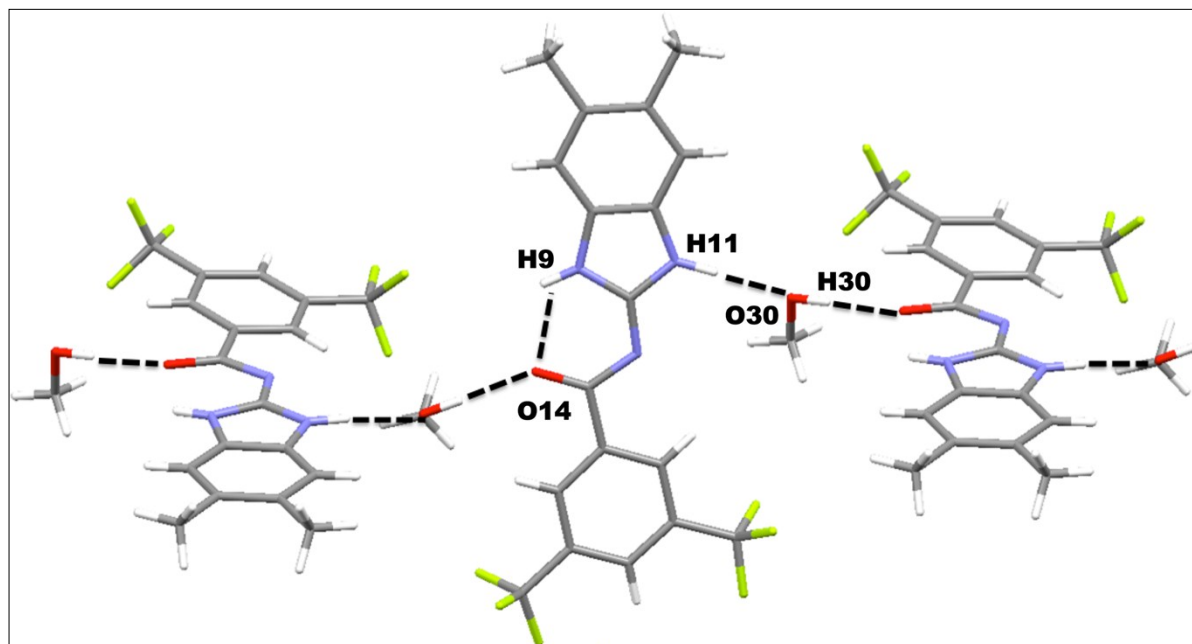

|                       | Intramolecular distance<br>NH...O=C | Intermolecular H-bond between 2a and CH <sub>3</sub> OH                                                 | Short contacts                                                                                  |
|-----------------------|-------------------------------------|---------------------------------------------------------------------------------------------------------|-------------------------------------------------------------------------------------------------|
| 2a.CH <sub>3</sub> OH | 2.085<br><N9-H9-O14>:<br>121.10°    | 1.887 (O-H...O <sub>amide</sub> ,<br>O30H30/O14, 179.33°),<br>1.893 (N-H...O-H,<br>N11H11/O30, 173.26°) | C-F...F-C: 2.993 (F23-F24)<br>and Multiple contacts due to Pi-Pi stacking between 2a molecules. |

The flat **2a** molecules stacked in a slightly off-set arrangement (centroid distance between benzimidazole units: 4.828 Å). Each aromatic stack is surrounded by two methanol "channels", and is tilted by ca. 82.4° from the next aromatic stack..

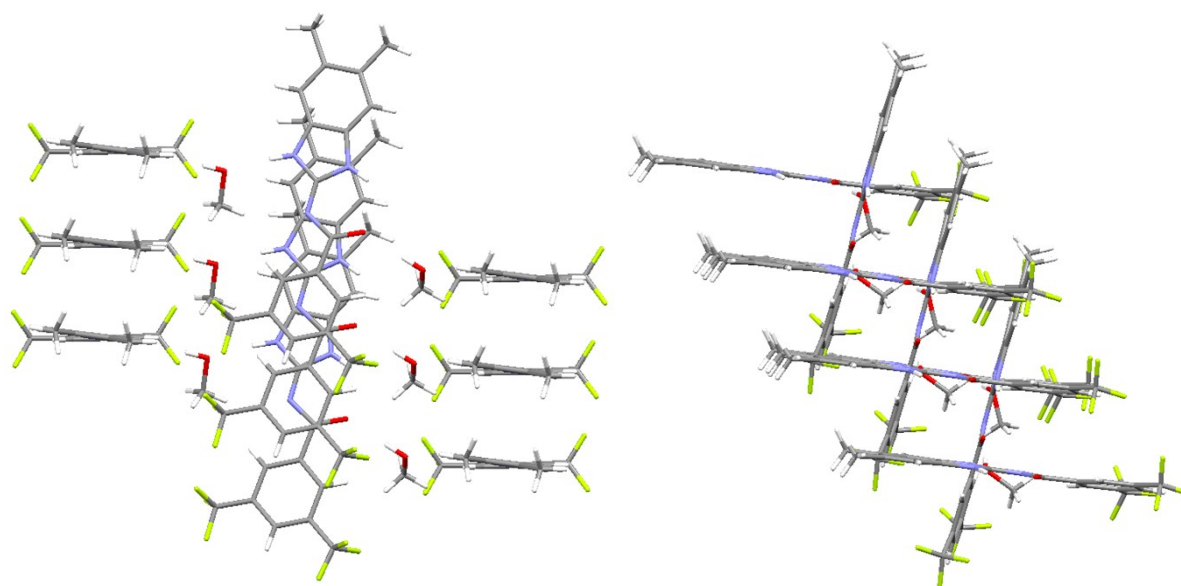

Views in the **2a.CH<sub>3</sub>OH** crystal. Left: face; right: side view.



**Table S8-F.** Selected Hydrogen Bond length (Å) and angles (°) in monocystal of **(1b).(1b – H<sup>+</sup>).nBu<sub>4</sub>N<sup>+</sup>** obtained in the presence of *n*Bu<sub>4</sub>N<sup>+</sup>.PhCO<sub>2</sub><sup>–</sup>

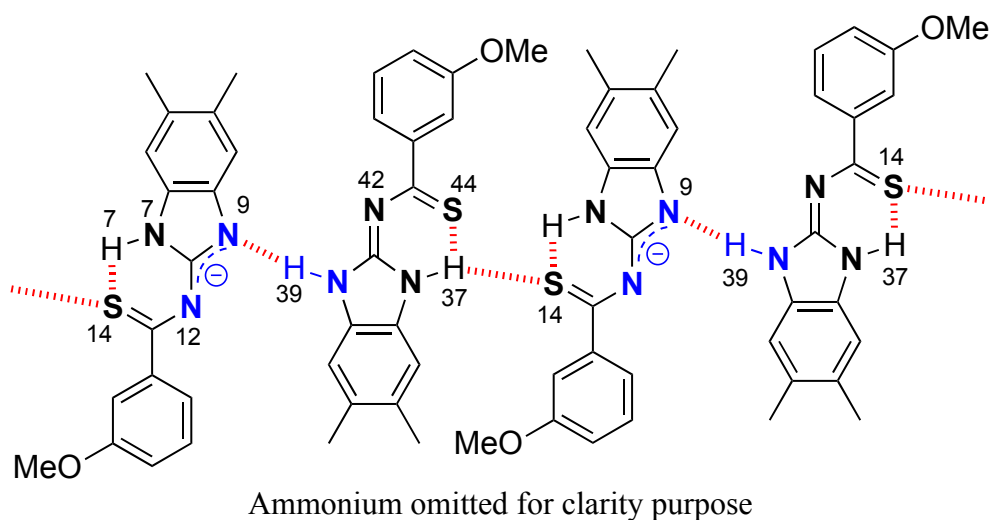

| Compound                                                                 | Intramolecular contact ( <b>1b</b> )          | Intermolecular contacts between <b>1b</b> molecules                                                                                                   | Other Short Contacts                                                                                                                                                                                  |
|--------------------------------------------------------------------------|-----------------------------------------------|-------------------------------------------------------------------------------------------------------------------------------------------------------|-------------------------------------------------------------------------------------------------------------------------------------------------------------------------------------------------------|
| <b>(1b).</b><br><b>(1b – H<sup>+</sup>).nBu<sub>4</sub>N<sup>+</sup></b> | N-H...S=C: 2.304<br>(H37-S44), 2.462 (H7-S14) | N-H...S=C: 2.930<br>(H37-S14)<br><br>N-H...N <sup>0.5–</sup> : 1.722<br>(H39-N9)<br><br>C <sub>Ar</sub> -H...N: 2.763<br>(H31-N12), 2.783<br>(H1-N42) | Multiple contacts between <b>(1b)</b> or <b>(1b – H<sup>+</sup>)</b> and the surrounding ammoniums (CH bond) with distances between 2.7 and 3.2 Å: 2.737 (N9-H73B), 2.802 (N39-H65B), 2.748 (N9-H63A) |

Each **1b** and **(1b – H<sup>+</sup>)** molecule is almost planar (C46C45C43N42 angle = 14.63° for **1b** and C16C15C13N12 angle = 11.43° for **(1b – H<sup>+</sup>)** . In **(1b – H<sup>+</sup>)** molecule, the negative charge is delocalized between N9 and N12.

Species **1b** and **(1b – H<sup>+</sup>)** form a dimer strongly tied by a N-H...N<sup>–</sup> interaction (d = 1.722 Å) with a delocalized negative charge over the benzimidazole nitrogen atoms. This dimer has an X-shape arrangement (angle of 43.54° between **1b** and **(1b – H<sup>+</sup>)** planes). Each **1b.(1b – H<sup>+</sup>)** dimer is in close contact with two other dimers through a N-H...S=C contact (d = 2.930 Å) and C<sub>Ar</sub>-H...N contacts (d = 2.76-2.78 Å)

The zig-zag arrangement of these **1b.(1b – H<sup>+</sup>)** dimers is surrounded by an upper and lower layer of *n*Bu<sub>4</sub>N<sup>+</sup> in short contacts (d = 2.7-3.2 Å).

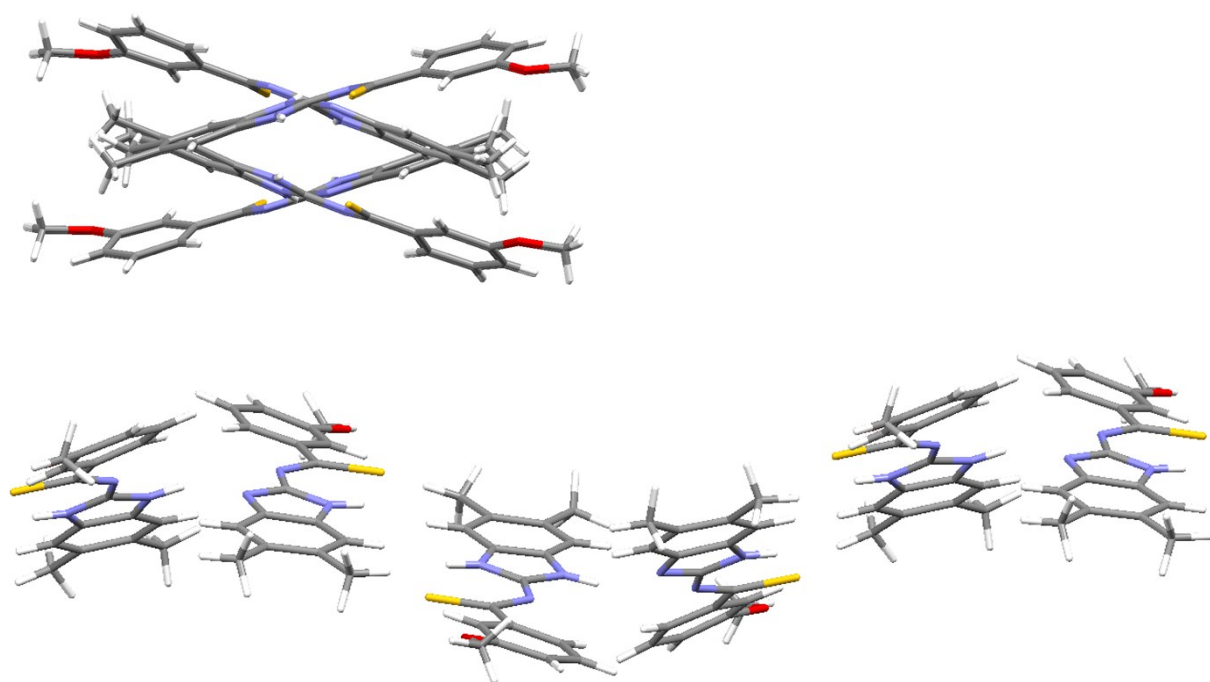

Views in the **(1b).(1b – H<sup>+</sup>).nBu<sub>4</sub>N<sup>+</sup>** crystal (ammoniums omitted for clarity). Left: face; right: side view.

**Table S8-G.** Selected Hydrogen Bond length (Å) and angles (°) in monocystal of **(2b – 0.5 H<sup>+</sup>).(2b – 0.5 H<sup>+</sup>).nBu<sub>4</sub>N<sup>+</sup>** obtained in the presence of *n*Bu<sub>4</sub>N<sup>+</sup>.PhCO<sub>2</sub><sup>–</sup>

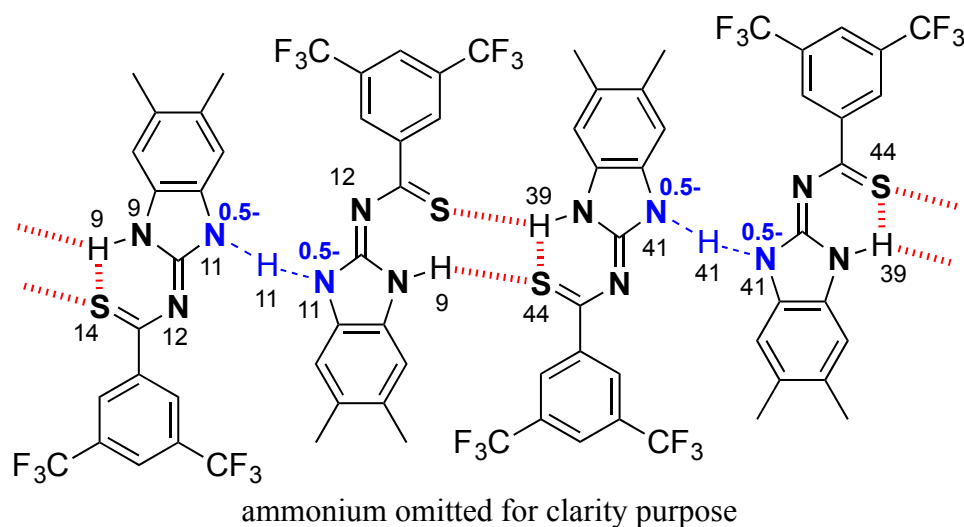

| Compound                                                                                                               | Intramolecular contact ( <b>2b – 0.5 H<sup>+</sup></b> ) | Intermolecular contacts between ( <b>2b – 0.5 H<sup>+</sup></b> ) molecules                                                                                                                                                                       | Other Short Contacts                                                                                                                                                                                                          |
|------------------------------------------------------------------------------------------------------------------------|----------------------------------------------------------|---------------------------------------------------------------------------------------------------------------------------------------------------------------------------------------------------------------------------------------------------|-------------------------------------------------------------------------------------------------------------------------------------------------------------------------------------------------------------------------------|
| <b>(2b – 0.5 H<sup>+</sup>).(2b – 0.5 H<sup>+</sup>).nBu<sub>4</sub>N<sup>+</sup></b><br><br>(2 independent molecules) | N-H...S=C: 2.319 (H9-S14), 2.380 (H39-S44)               | N-H...S=C: 2.631 (H39-S14), 3.008 (H9-S44)<br><br>Half-deprotonation ( <u>N</u> <sup>0.5–</sup> ...H... <u>N</u> <sup>0.5–</sup> ):<br>2.702 (N11 H11 N11),<br>2.604 (N41 H41 N41)<br><br>C <sub>Ar</sub> -H...N: 3.122 (H31-N42), 3.501 (H1-N12) | Multiple contacts between ( <b>2b – 0.5 H<sup>+</sup></b> ) molecules and the surrounding ammoniums (CH bond) with distances between 2.7 and 3.2Å:<br>2.690 (H75B-S14), 2.921 (H83B-S14), 2.860 (H83A-S44), 3.020 (H75A-S44). |

In the crystal, the two independent (**2b – 0.5 H<sup>+</sup>**) molecules are observed. each conjugated structure is slightly tilted: -11.3° (angle C20C15C13N12) and 5.3° (C50C45C43N42).

Each (**2b – 0.5 H<sup>+</sup>**) compound is involved in a dimer association with an identical molecule, which is tied by a strong N<sup>0.5–</sup>...H...N<sup>0.5–</sup> interaction (distances between nitrogen atoms = 2.60-2.70 Å). This dimer has an X-shape arrangement (angles of 48.00° and 39.58° within both different dimers). Each 2.(**2b – 0.5 H<sup>+</sup>**) dimer is in close contact with two other dimers through N-H...S=C contacts (d = 2.63-3.01 Å).

The zig-zag arrangement of these dimers is surrounding by an upper and lower layer of *n*Bu<sub>4</sub>N<sup>+</sup> in short contacts (d = 2.7-3.2Å).

Views in the  $(\mathbf{2b} - 0.5 \text{ H}^+).(\mathbf{2b} - 0.5 \text{ H}^+).n\text{Bu}_4\text{N}^+$  crystal (without and with surrounding ammonium layers). (a): face; (b): side view.

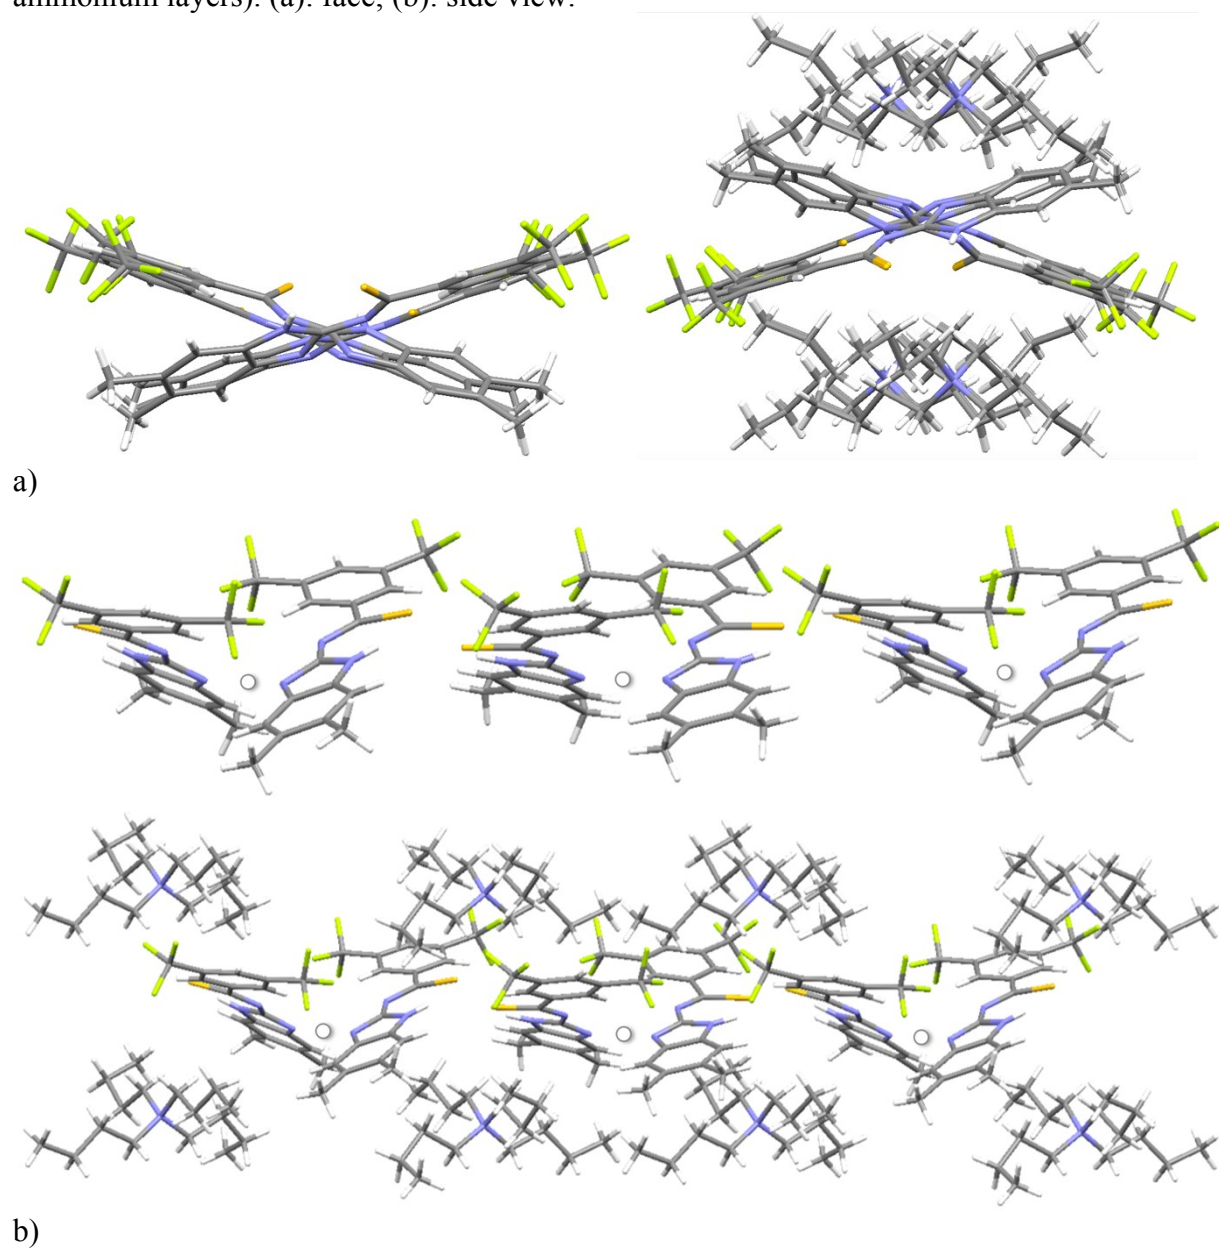

## UV-Visible Titrations between Compounds 1–2 and salts in acetonitrile

Acetonitrile was dried over calcium hydride and freshly distilled. Commercially available *n*-tetrabutylammonium salts ( $X^-$ :  $F^-$ ,  $Br^-$ ,  $CN^-$ ,  $H_2PO_4^-$ ,  $CH_3CO_2^-$ ,  $PhCO_2^-$ ) were dried under vacuum at 60°C overnight and used.

**UV-Visible Titrations:** all solutions were freshly prepared. Equilibrium constants ( $K_{eq}$ ) between hosts **1–2** and guests (*n*-Bu<sub>4</sub>NX) were determined using titrations monitored by UV-Visible (host signals) in acetonitrile. A solution (2.5 mL) of host ( $2.5 \times 10^{-5}$  M) was introduced in a quartz cuvette at 20°C. Increasing aliquots (20  $\mu$ L) of guest stock solution ( $5 \times 10^{-3}$ – $10^{-2}$  M in CH<sub>3</sub>CN) were successively added until the final total volume reached 2.8 ml at maximum. At each addition, the same aliquot was added to the reference tank (acetonitrile, 2.5 mL). The titration data ( $\Delta\epsilon$  *versus* guest concentration) were fitted using the nonlinear curve-fitting procedure with a (1:1) or (1:2) binding equation using Letagrop program.<sup>5</sup>

### 1) Amido- Benzimidazole 1a:

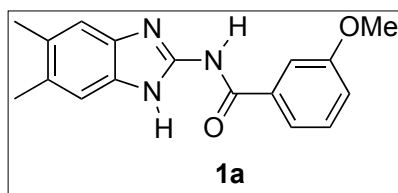

#### 1a) UV-Vis. Titration between 1a and $n\text{-Bu}_4\text{N}^+ \cdot \text{Br}^-$

Host: 1 eq.; Guest: 0–38 equivalents

$\epsilon = f(\lambda)$

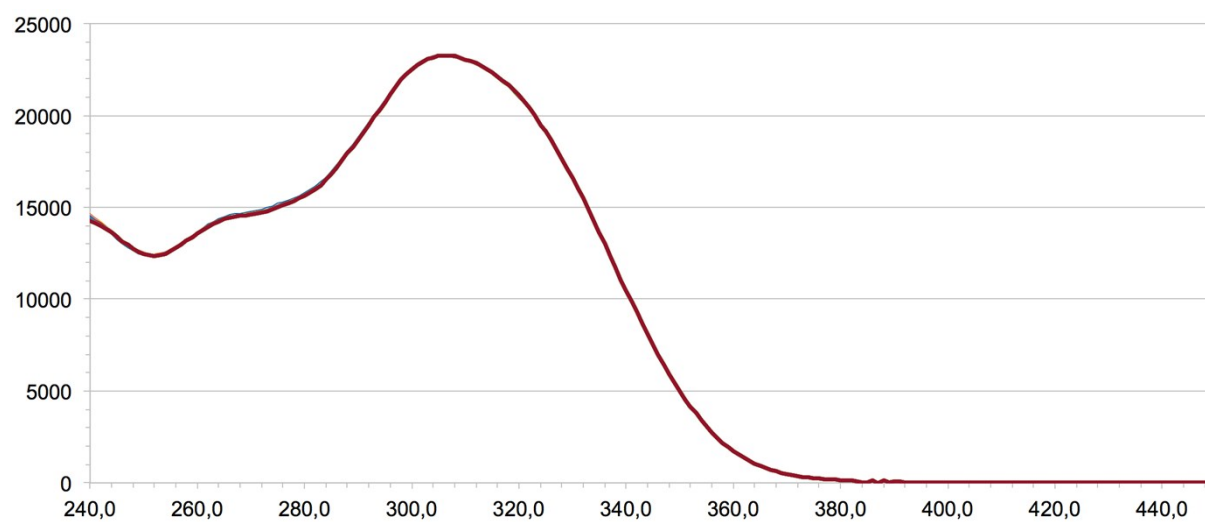

#### 1b) UV-Vis. Titration between 1a and $n\text{-Bu}_4\text{N}^+ \cdot \text{H}_2\text{PO}_4^-$

Host: 1 eq.; Guest: 0–57 equivalents;  $\log K_{\text{eq}} (1:1) = 3.3099 \pm 0.0005$

$\epsilon = f(\lambda)$

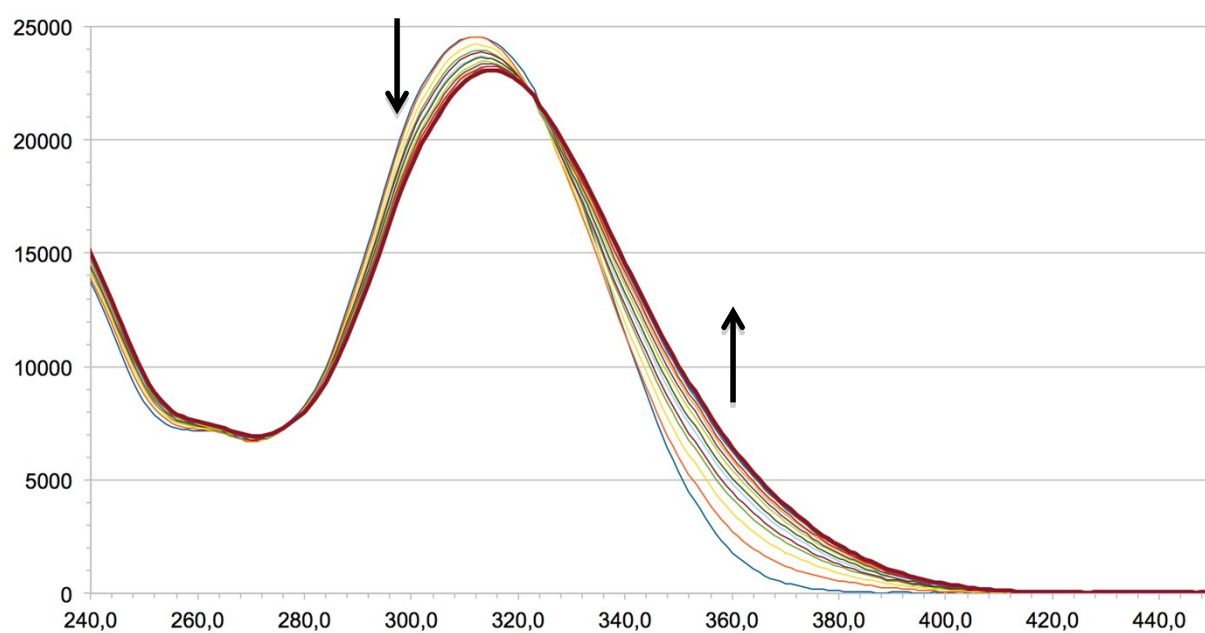

**1c) UV-Vis. Titration between 1a and  $n\text{-Bu}_4\text{N}^+ \cdot \text{PhCO}_2^-$**

Host: 1 eq.; Guest: 0–38 equivalents;  $\log K_{\text{eq}} (1:1) = 3.4634 \pm 0.0339$

$\epsilon = f(\lambda)$

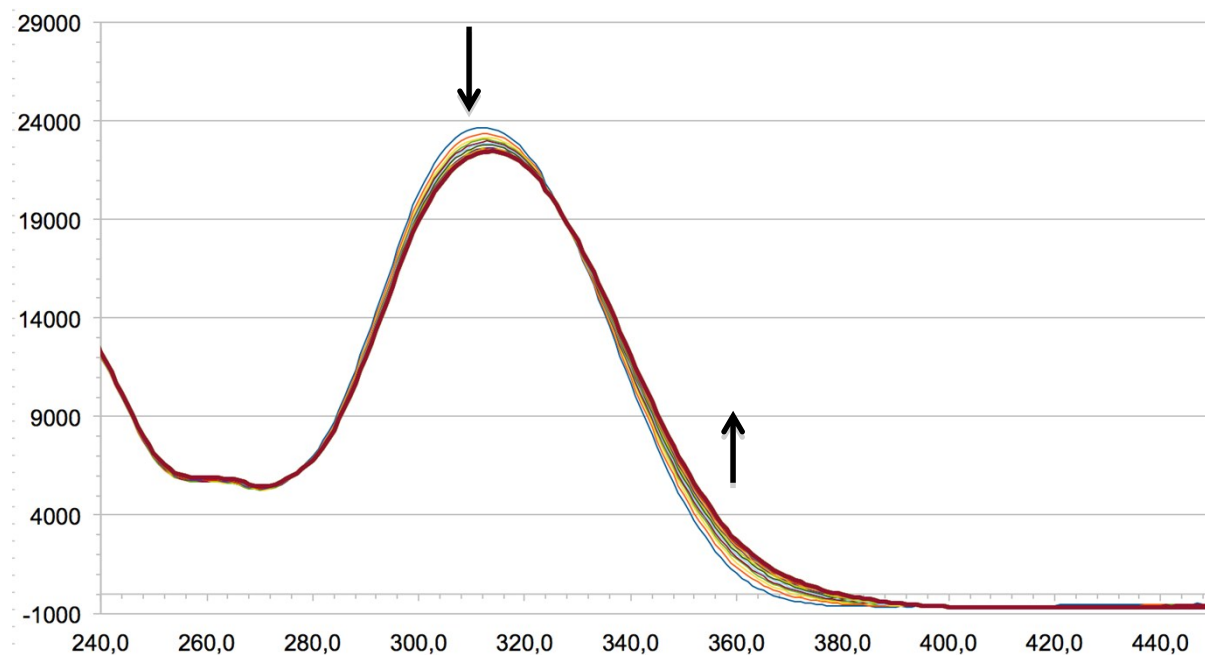

**1d) UV-Vis. Titration between 1a and  $n\text{-Bu}_4\text{N}^+ \cdot \text{CH}_3\text{CO}_2^-$**

Host: 1 eq.; Guest: 0–40 equivalents;  $\log K_{\text{eq}} (1:1) = 3.4300 \pm 0.0003$

$\epsilon = f(\lambda)$

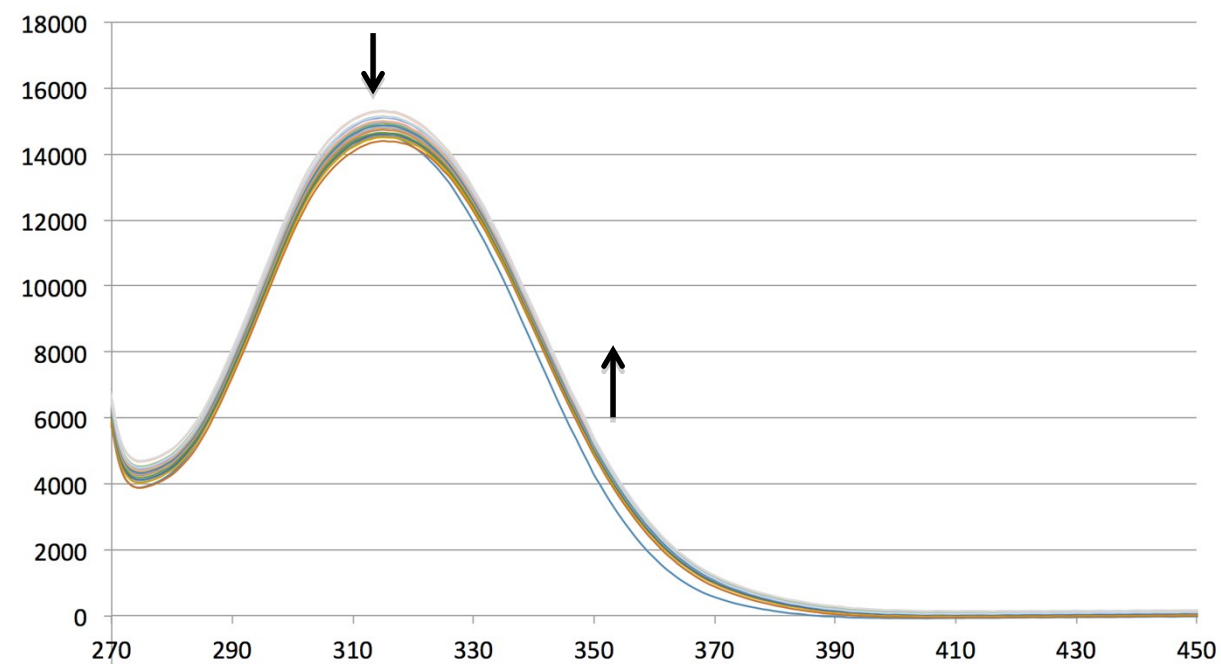



**1e) UV-Vis. Titration between 1a and  $n\text{-Bu}_4\text{N}^+ \cdot \text{CN}^-$**

Host: 1 eq.; Guest: 0–40 equivalents;  $\log K_{\text{eq}} (1:1) = 4.7704 \pm 0.0252$

$\epsilon = f(\lambda)$

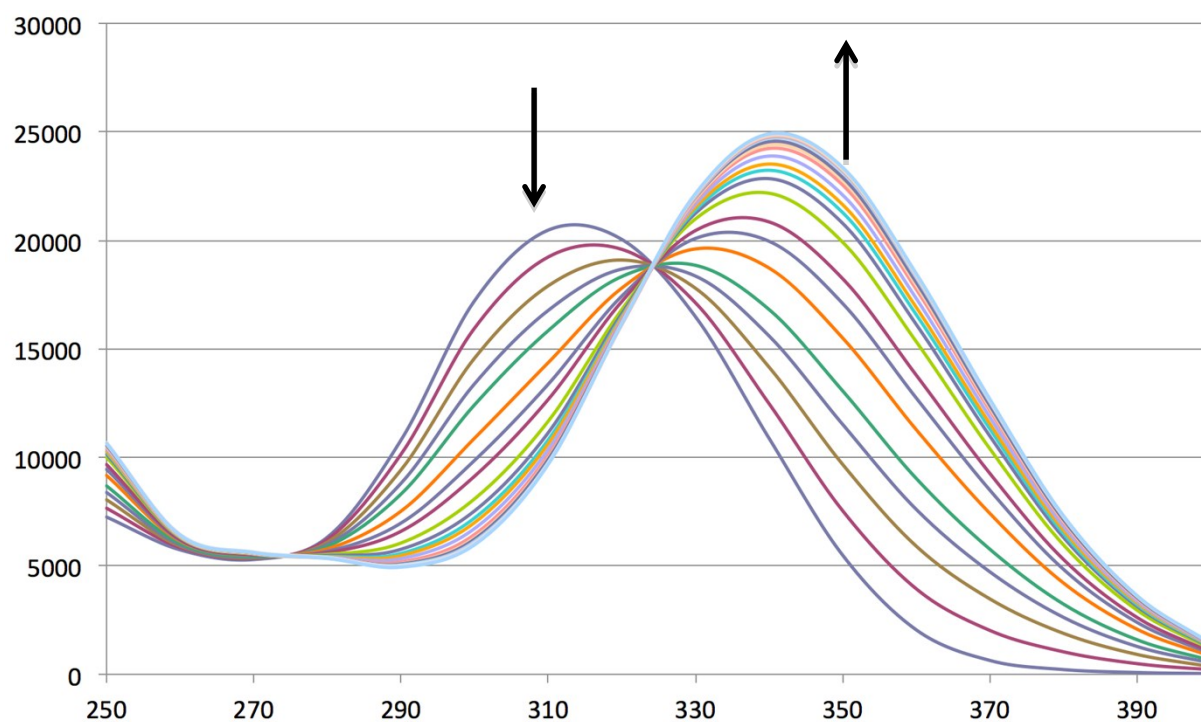

**1f) UV-Vis. Titration between 1a and  $n\text{-Bu}_4\text{N}^+ \cdot \text{F}^-$**

Host: 1 eq.; Guest: 0–16 equivalents;  $\log K_1 = 4.6742 \pm 0.0003$  and  $\log \beta = 9.8219 \pm 0.0454$

$\epsilon = f(\lambda)$

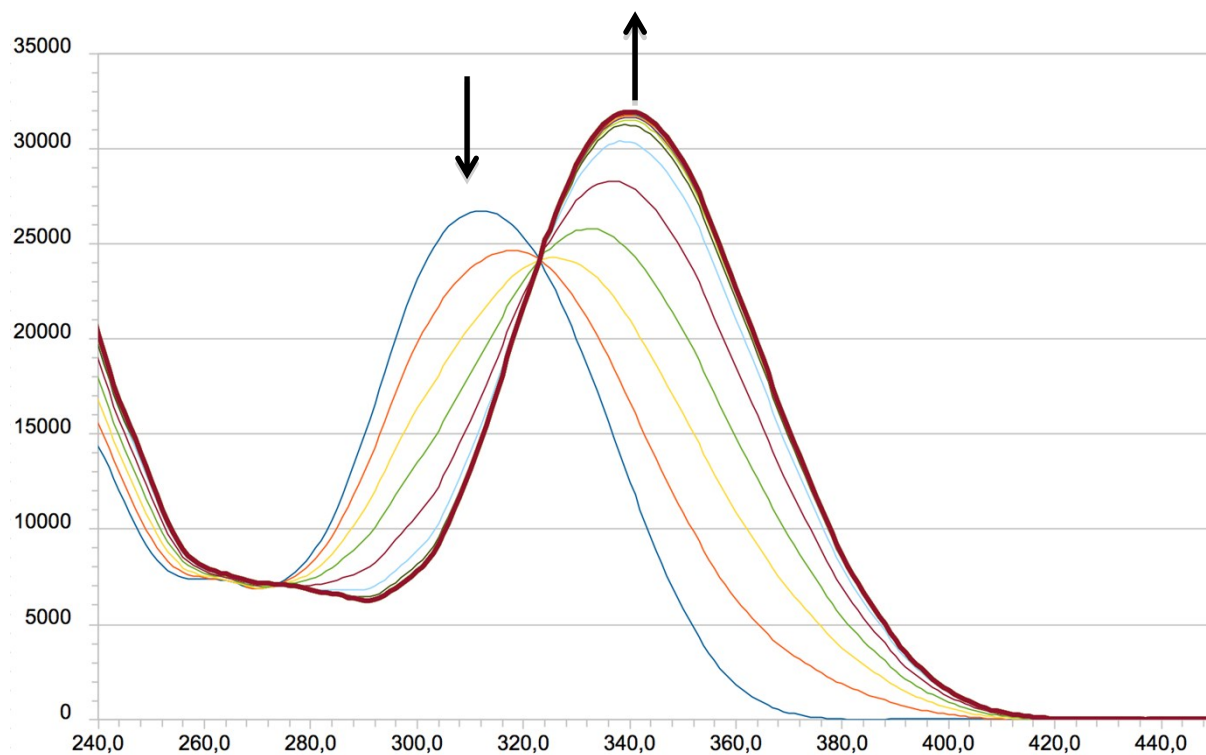



## 2) Thioamide-Benzimidazole 1b:

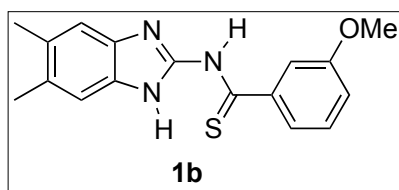

### 2a) Titration between 1b and $n\text{-Bu}_4\text{N}^+.\text{Br}^-$

Host: 1 eq.; Guest: 0–20 equivalents

$\epsilon = f(\lambda)$

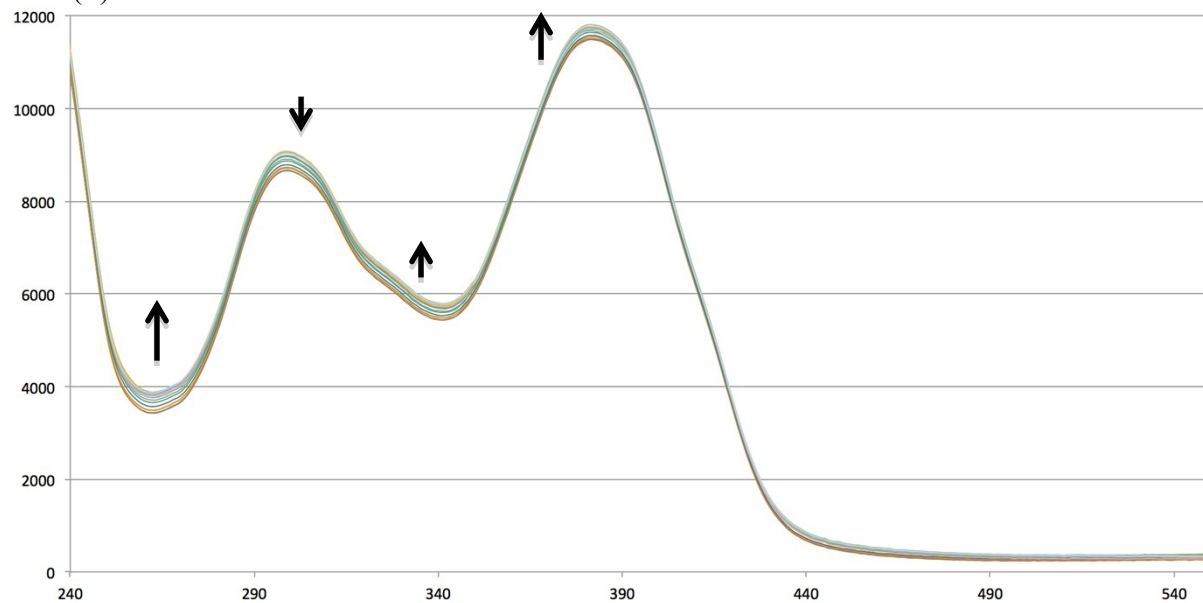

### 2b) Titration between 1b and $n\text{-Bu}_4\text{N}^+.\text{H}_2\text{PO}_4^-$

Host: 1 eq.; Guest: 0–20 equivalents;  $\log K_{\text{eq}} (1:1) = 4.4053 \pm 0.0493$

$\epsilon = f(\lambda)$

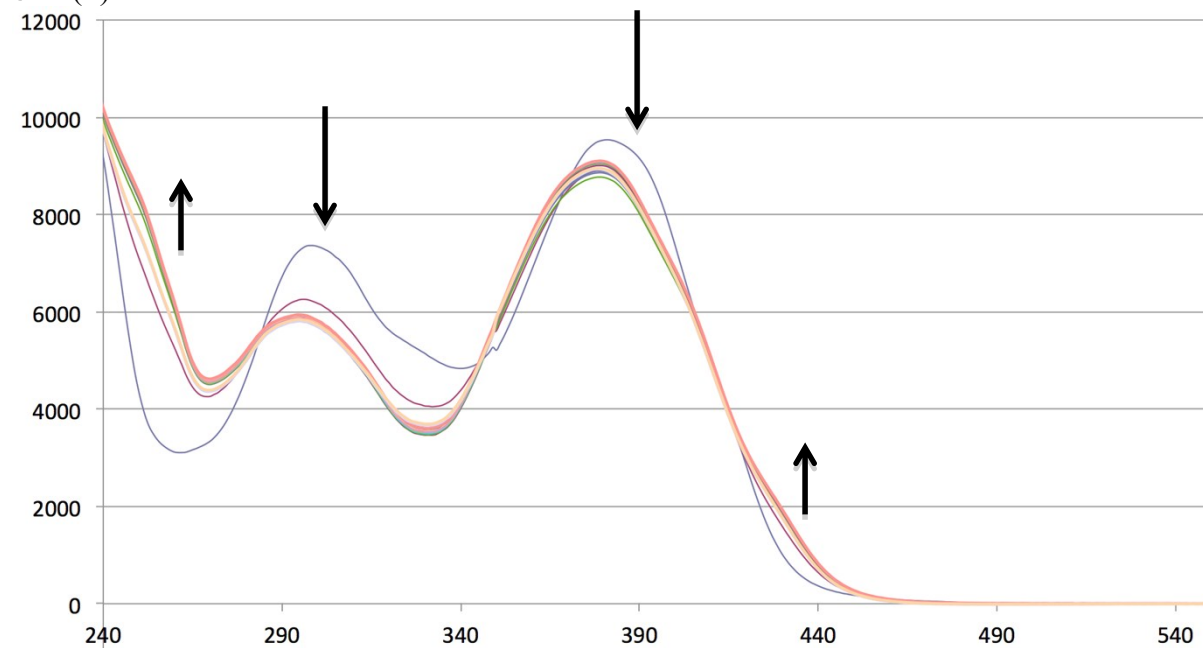

**2c) UV-Vis. Titration between 1b and  $n\text{-Bu}_4\text{N}^+ \cdot \text{PhCO}_2^-$**

Host: 1 eq.; Guest: 0–32 equivalents;  $\log K_{\text{eq}} (1:1) = 4.1751 \pm 0.0243$

$\epsilon = f(\lambda)$

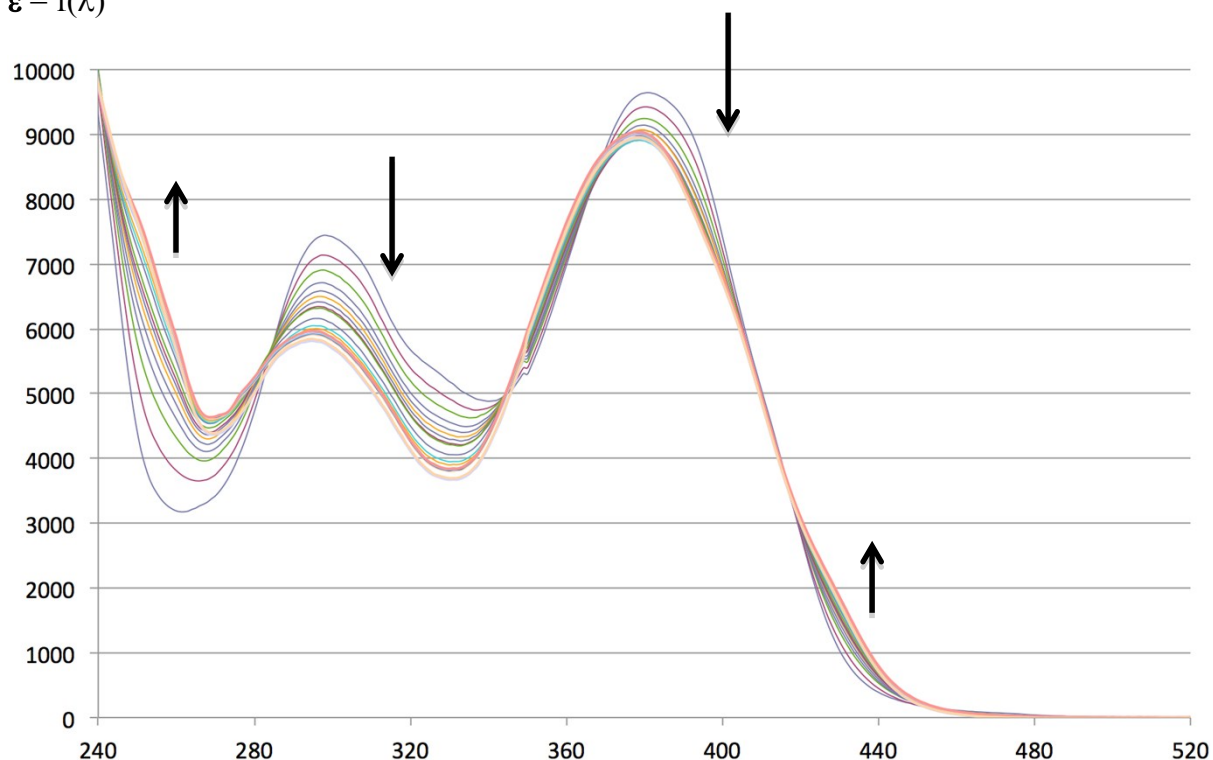

**2d) UV-Vis. Titration between 1b and  $n\text{-Bu}_4\text{N}^+ \cdot \text{CH}_3\text{CO}_2^-$**

Host: 1 eq.; Guest: 0–20 equivalents;  $\log K_{\text{eq}} (1:1) = 5.1912 \pm 0.0904$

$\epsilon = f(\lambda)$

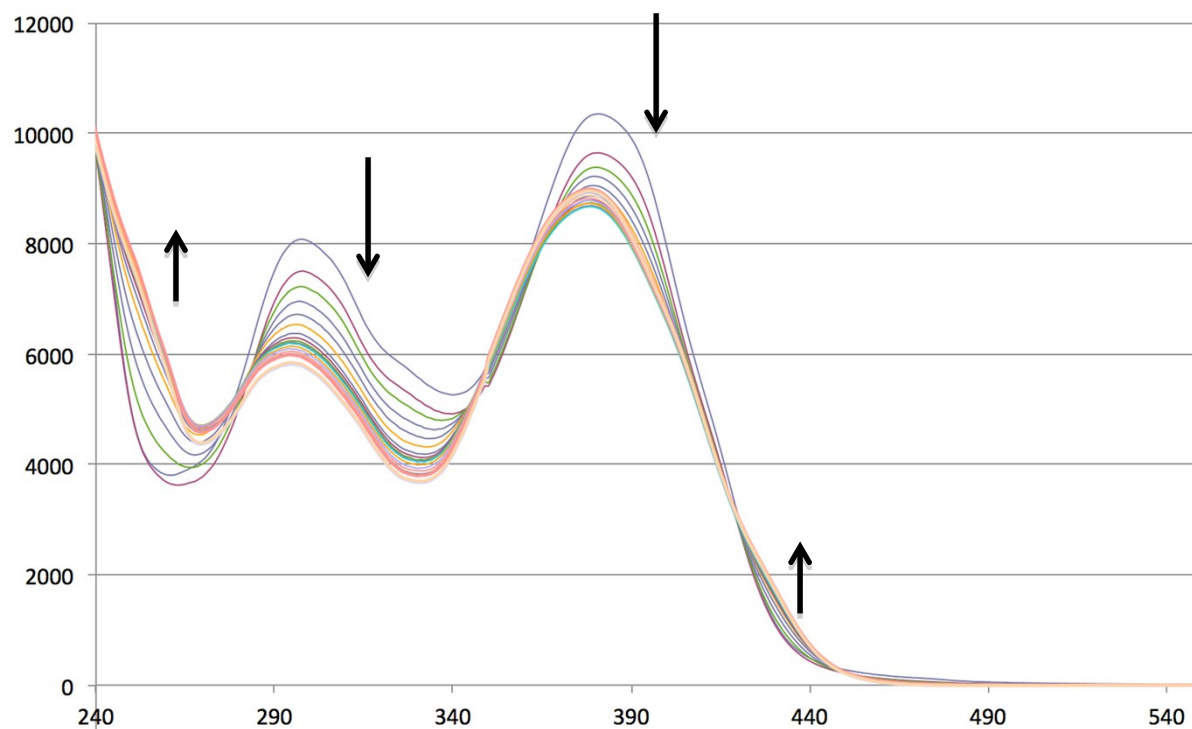

**2e) UV-Vis. Titration between 1b and  $n\text{-Bu}_4\text{N}^+ \cdot \text{CN}^-$**

Host: 1 eq.; Guest: 0–40 equivalents;  $\log K_{\text{eq}} (1:1) = 5.0941 \pm 0.1699$

$\epsilon = f(\lambda)$

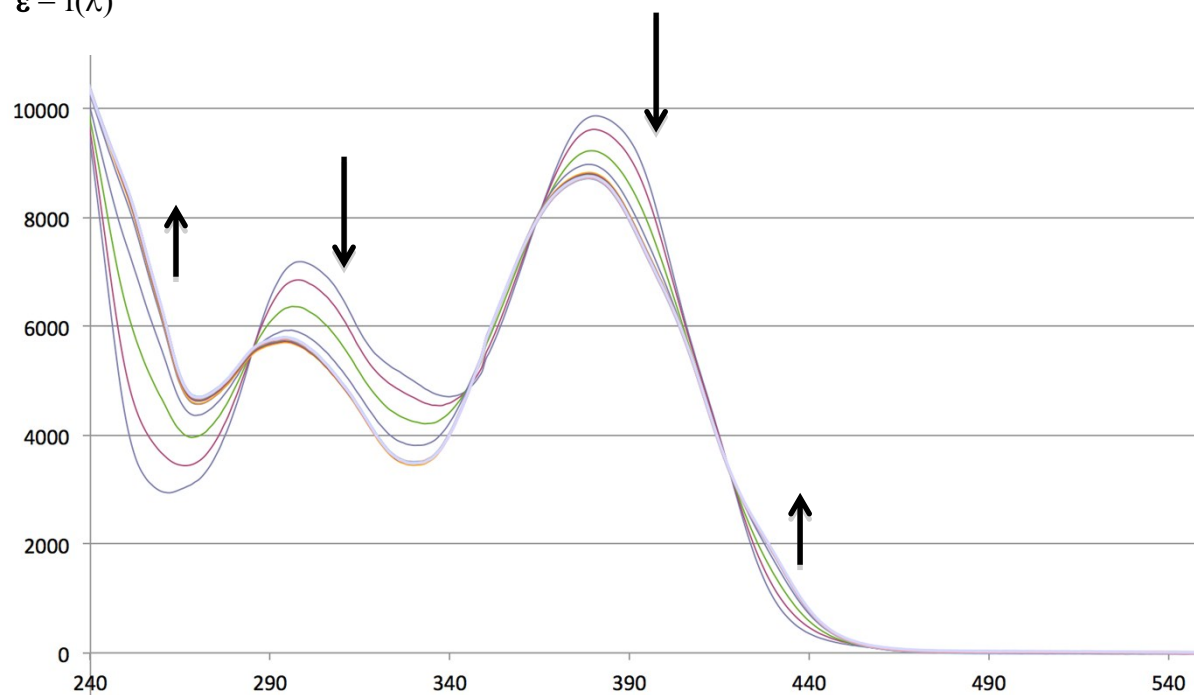

**2f) UV-Vis. Titration between 1b and  $n\text{-Bu}_4\text{N}^+ \cdot \text{F}^-$**

Host: 1 eq.; Guest: 0–40 equivalents;  $\log K_1 (1:1) = 3.4506 \pm 0.0231$  and  $\log \beta = 8.4103 \pm 0.0296$

$\epsilon = f(\lambda)$

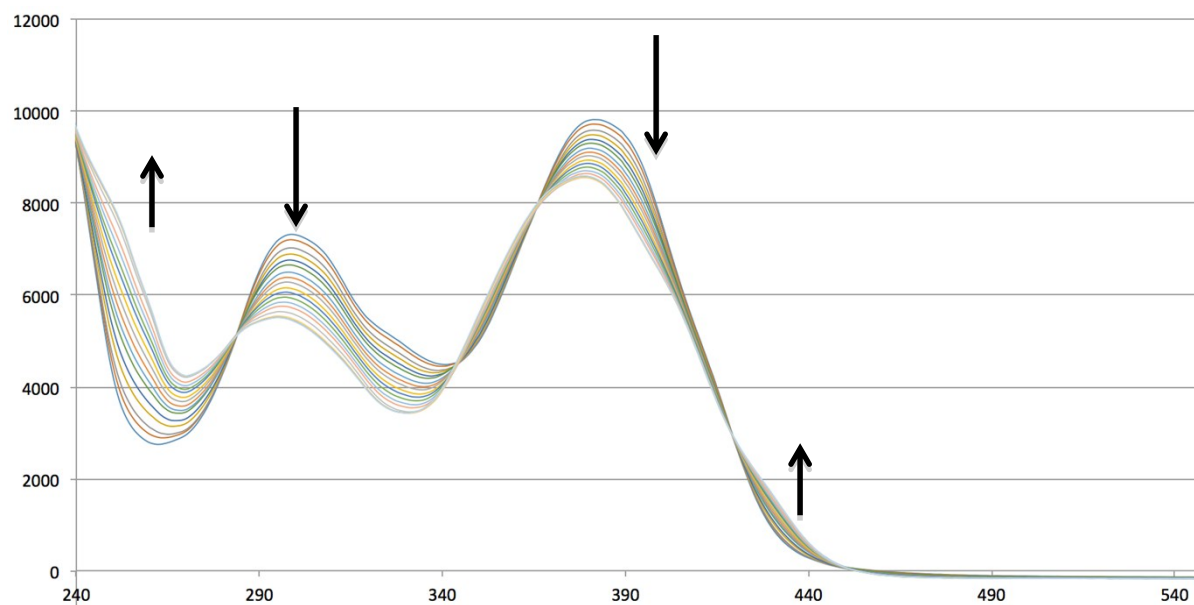

### 3) Amido-benzimidazole 2a:

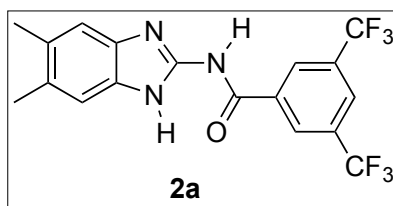

#### 3a) UV-Vis. Titration between 2a and $n\text{-Bu}_4\text{N}^+ \cdot \text{Br}^-$

Host: 1 eq.; Guest: 0–80 equivalents

$\epsilon = f(\lambda)$

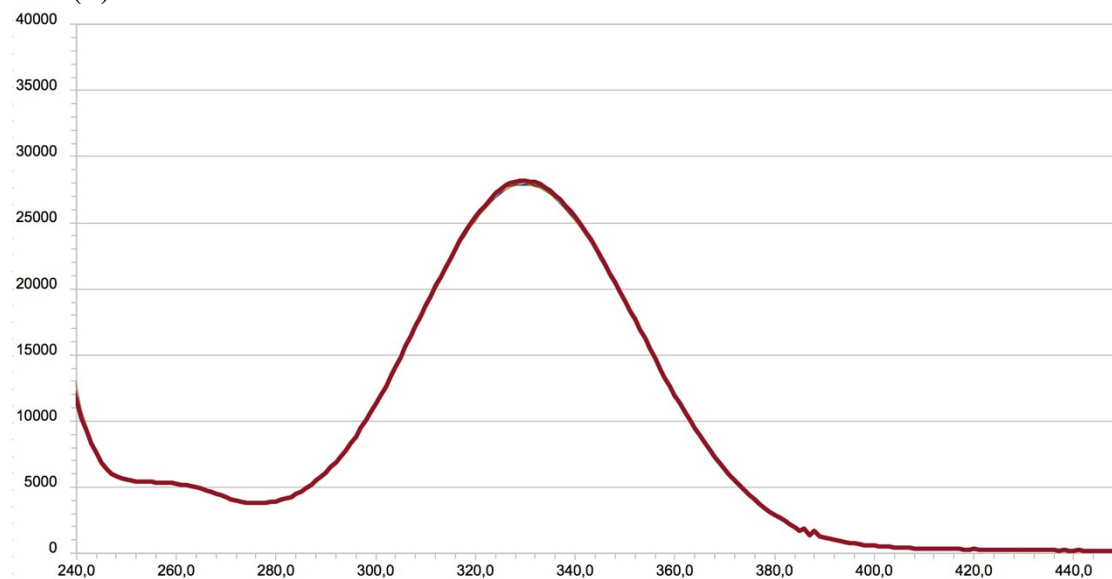

#### 3b) UV-Vis. Titration between 2a and $n\text{-Bu}_4\text{N}^+ \cdot \text{H}_2\text{PO}_4^-$

Host: 1 eq.; Guest: 0–60 equivalents;  $\log K_{\text{eq}} (1:1) = 3.7567 \pm 0.0086$

$\epsilon = f(\lambda)$

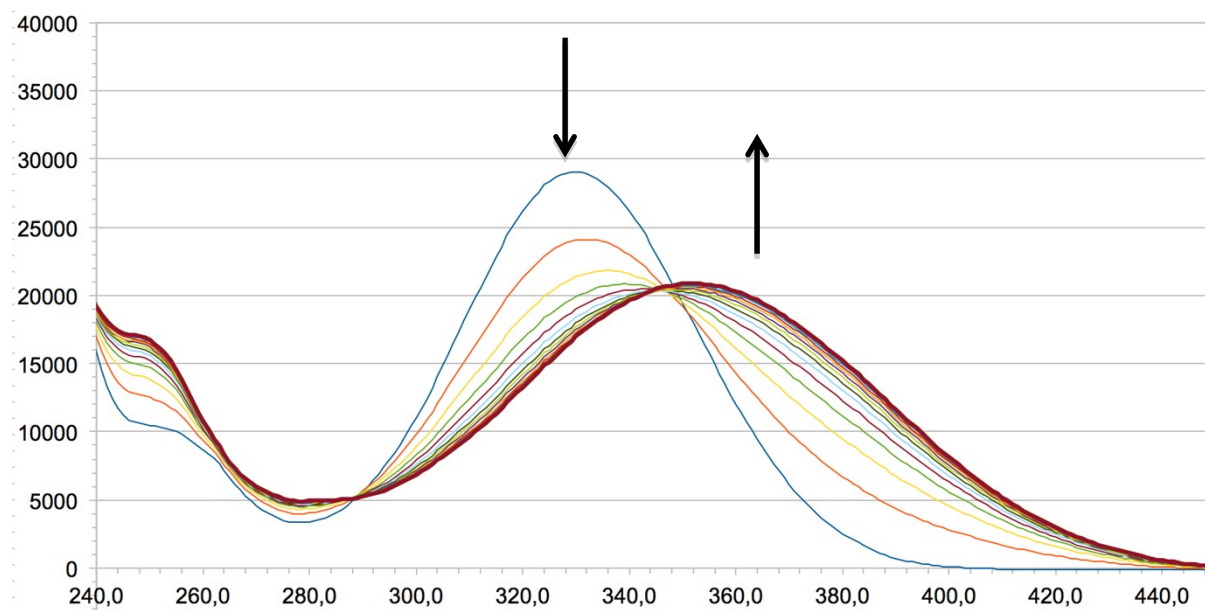

**3c) UV-Vis. Titration between 2a and  $n\text{-Bu}_4\text{N}^+ \cdot \text{PhCO}_2^-$**

Host: 1 eq.; Guest: 0–50 equivalents;  $\log K_{\text{eq}} (1:1) = 3.5984 \pm 0.0224$

$\epsilon = f(\lambda)$

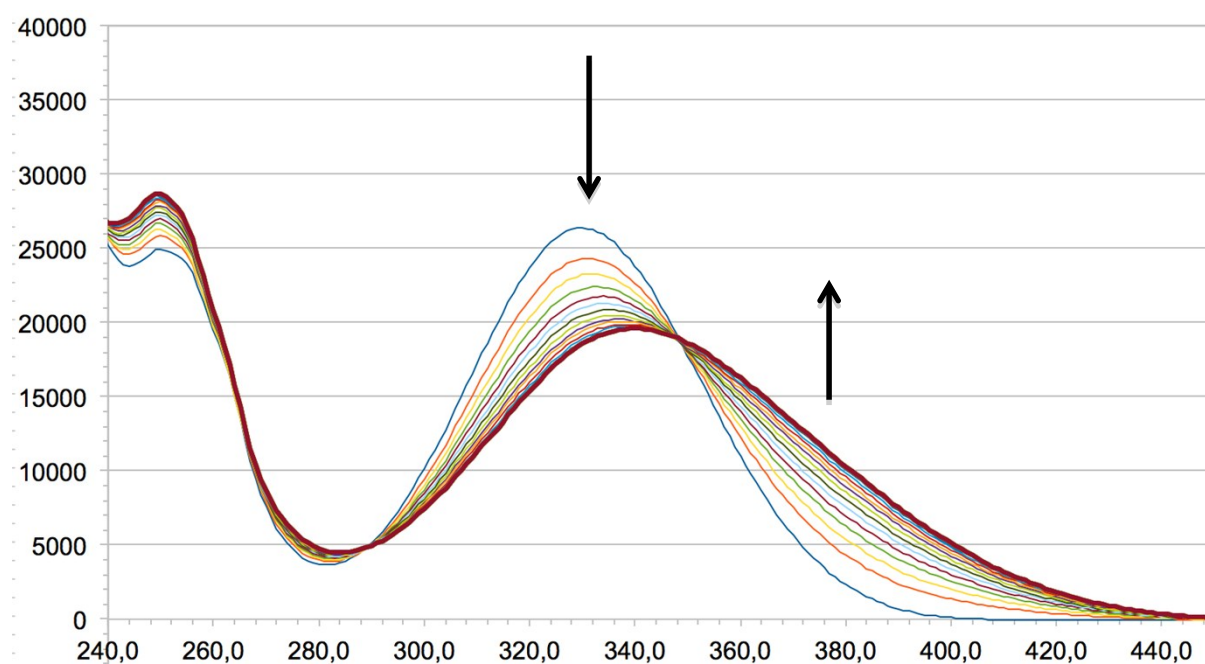

**3d) UV-Vis. Titration between 2a and  $n\text{-Bu}_4\text{N}^+ \cdot \text{CH}_3\text{CO}_2^-$**

Host: 1 eq.; Guest: 0–16 equivalents;  $\log K_{\text{eq}} (1:1) = 4.9007 \pm 0.0100$

$\epsilon = f(\lambda)$

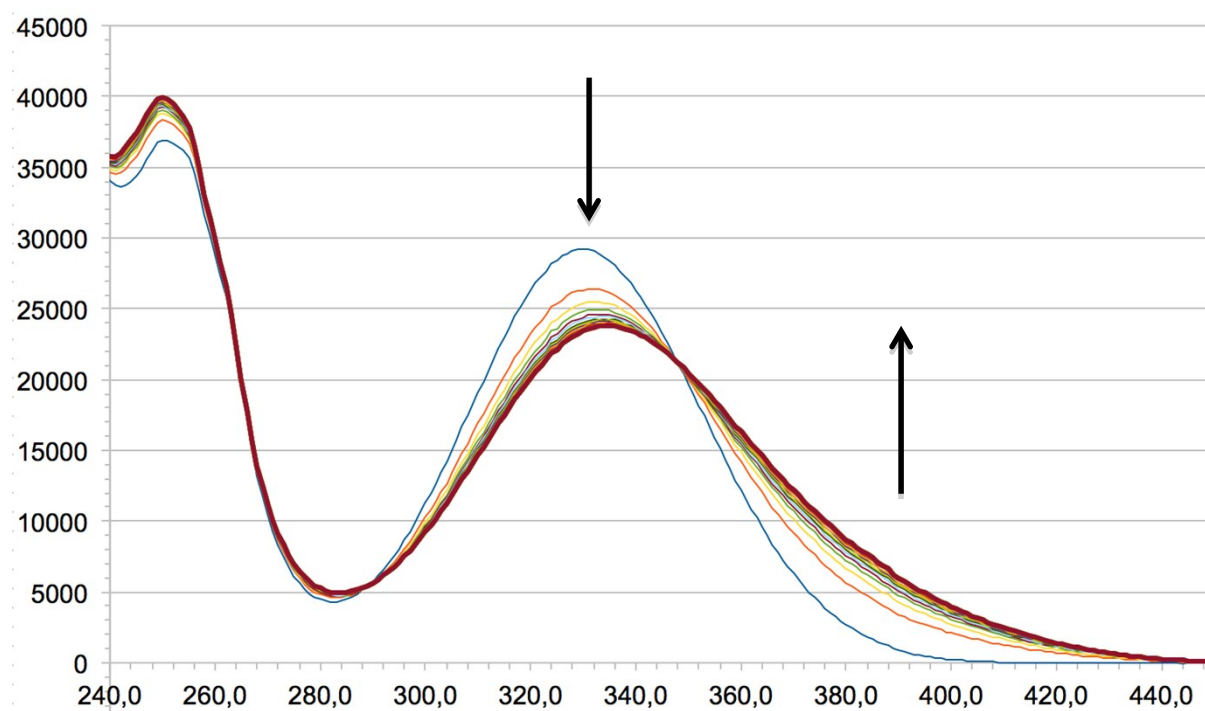

**3e) UV-Vis. Titration between 2a and  $n\text{-Bu}_4\text{N}^+ \cdot \text{CN}^-$**

Host: 1 eq.; Guest: 0–40 equivalents;  $\log K_{\text{eq}} (1:1) = 5.4639 \pm 0.0290$

$\epsilon = f(\lambda)$

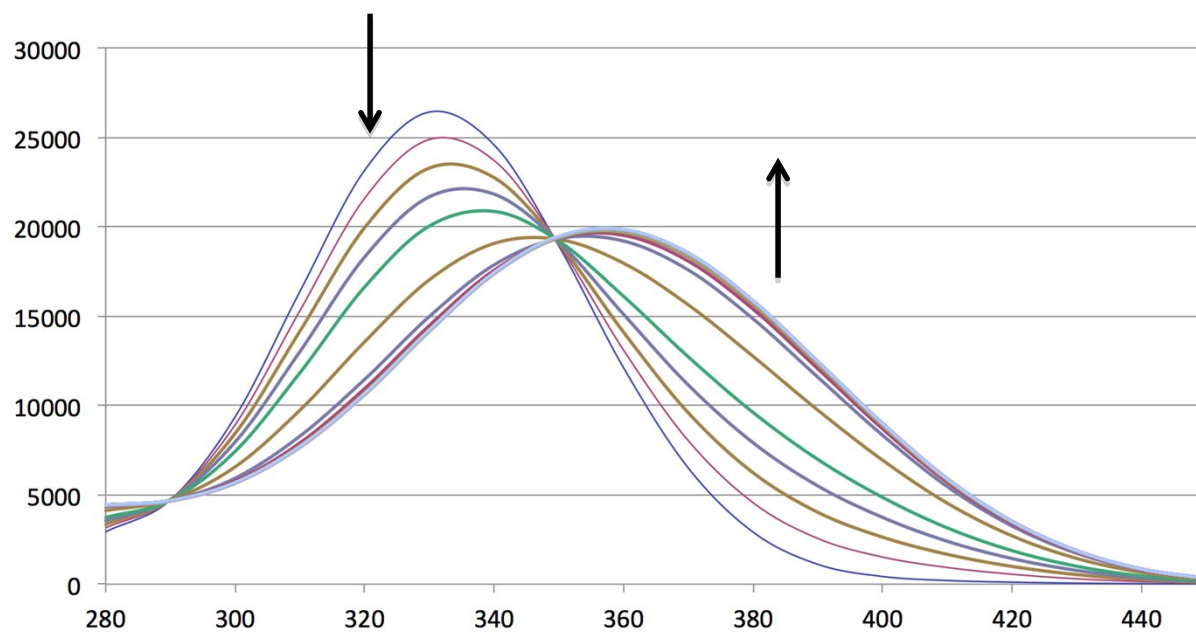

**3f) UV-Vis. Titration between 2a and  $n\text{-Bu}_4\text{N}^+ \cdot \text{F}^-$**

Host: 1 eq.; Guest: 0–16 equivalents;  $\log K_1 = 4.2071 \pm 0.0108$  and  $\log \beta = 9.0959 \pm 0.0804$

$\epsilon = f(\lambda)$

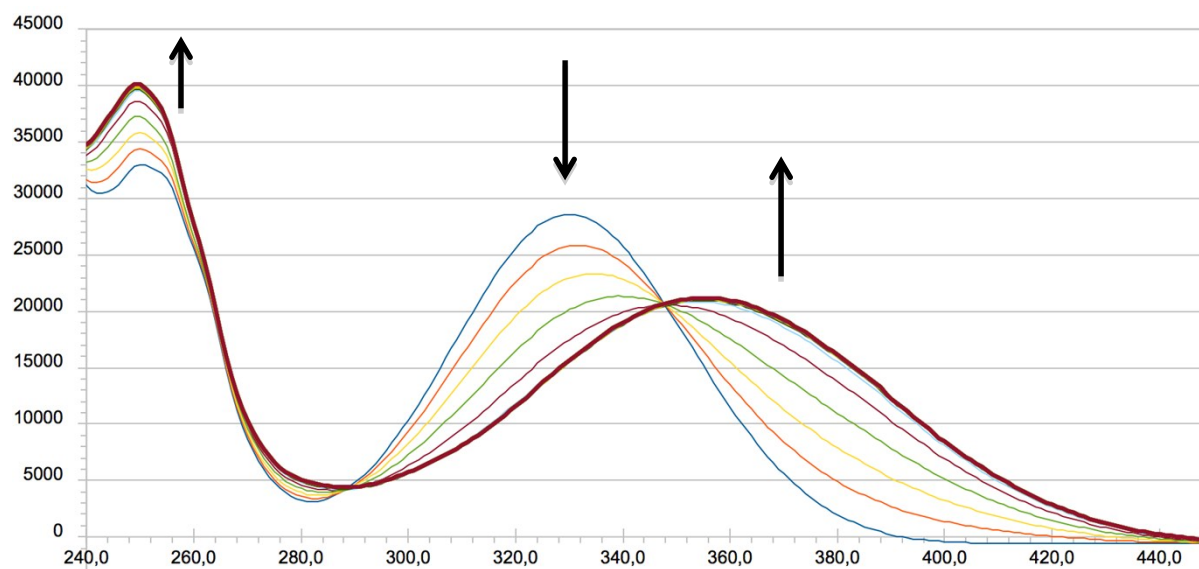

#### 4) Thioamido-Benzimidazole 2b:

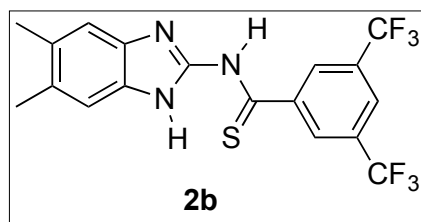

##### 4a) UV-Vis. Titration between 2b and $n\text{-Bu}_4\text{N}^+ \cdot \text{Br}^-$

Host: 1 eq.; Guest: 0–40 equivalents

$\epsilon = f(\lambda)$

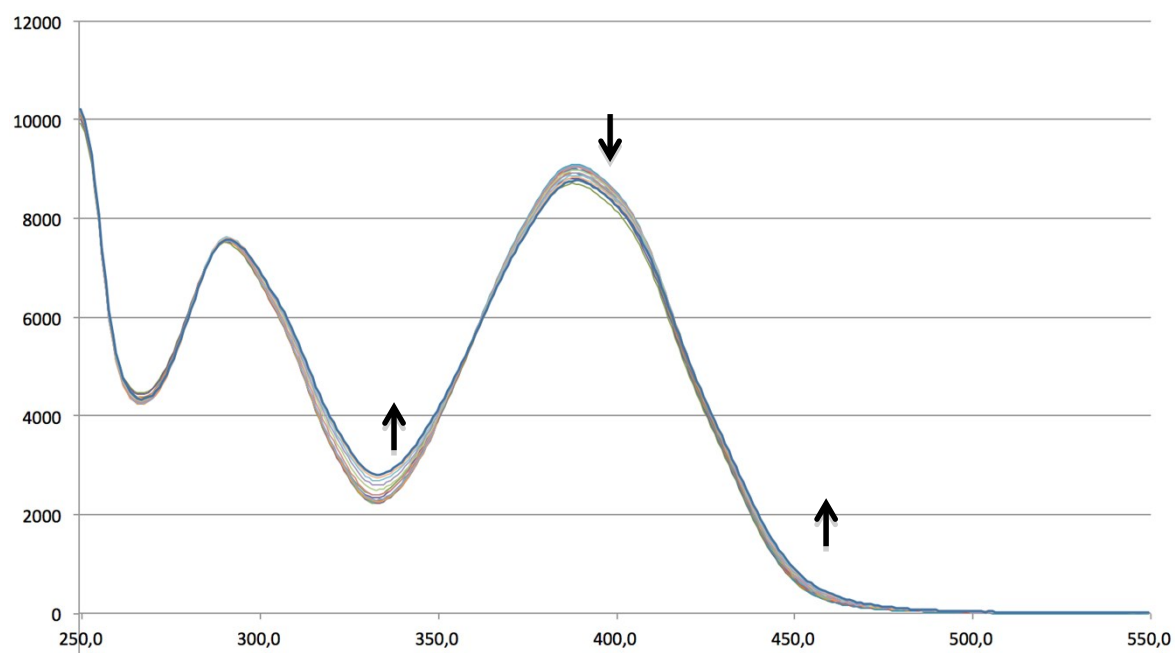

##### 4b) UV-Vis. Titration between 2b and $n\text{-Bu}_4\text{N}^+ \cdot \text{H}_2\text{PO}_4^-$

Host: 1 eq.; Guest: 0–40 equivalents;  $\log K_{\text{eq}} (1:1) = 5.0967 \pm 0.0966$

$\epsilon = f(\lambda)$

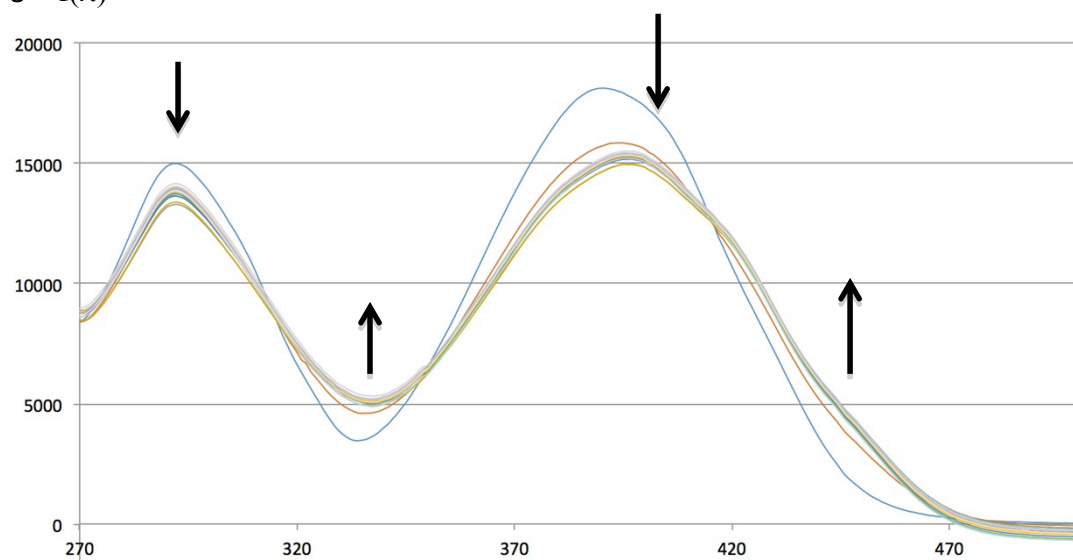



**4c) UV-Vis. Titration between 2b and  $n\text{-Bu}_4\text{N}^+ \cdot \text{PhCO}_2^-$**

Host: 1 eq.; Guest: 0–40 equivalents;  $\log K_{\text{eq}} (1:1) = 5.0567 \pm 0.0918$

$\epsilon = f(\lambda)$

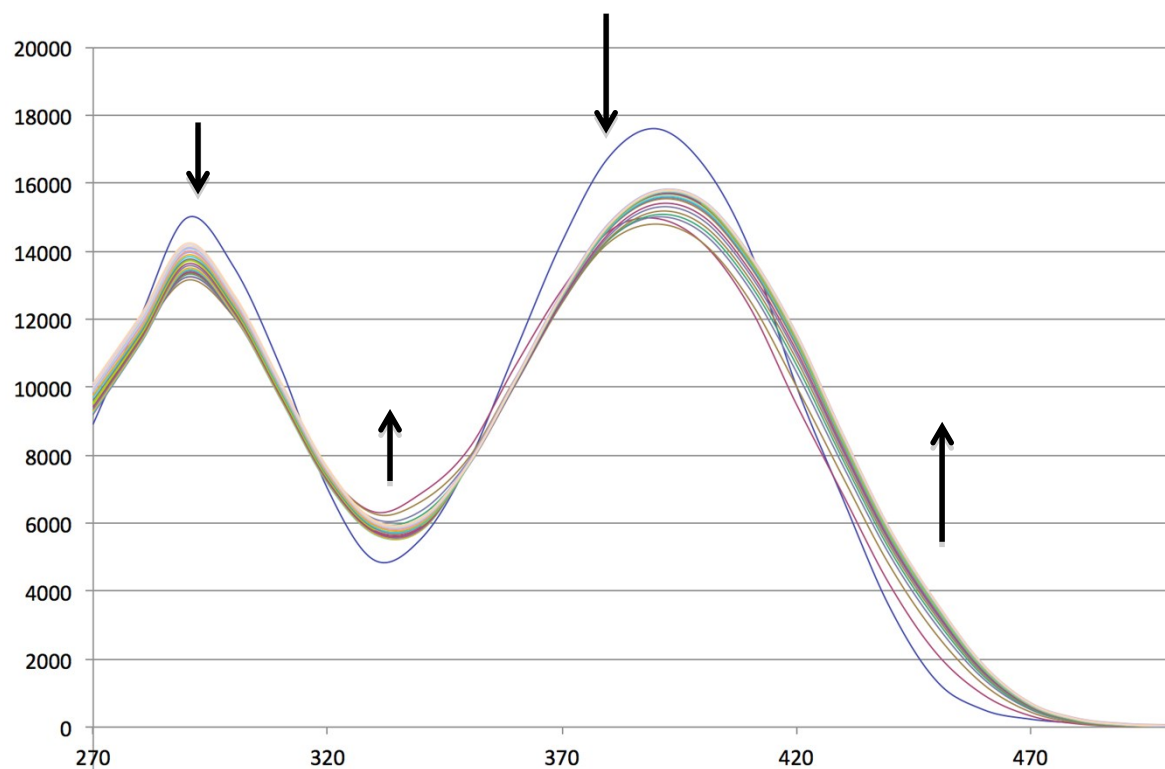

**4d) UV-Vis. Titration between 2b and  $n\text{-Bu}_4\text{N}^+ \cdot \text{CH}_3\text{CO}_2^-$**

Host: 1 eq.; Guest: 0–16 equivalents;  $\log K_{\text{eq}} (1:1) = 4.8024 \pm 0.1827$

$\epsilon = f(\lambda)$

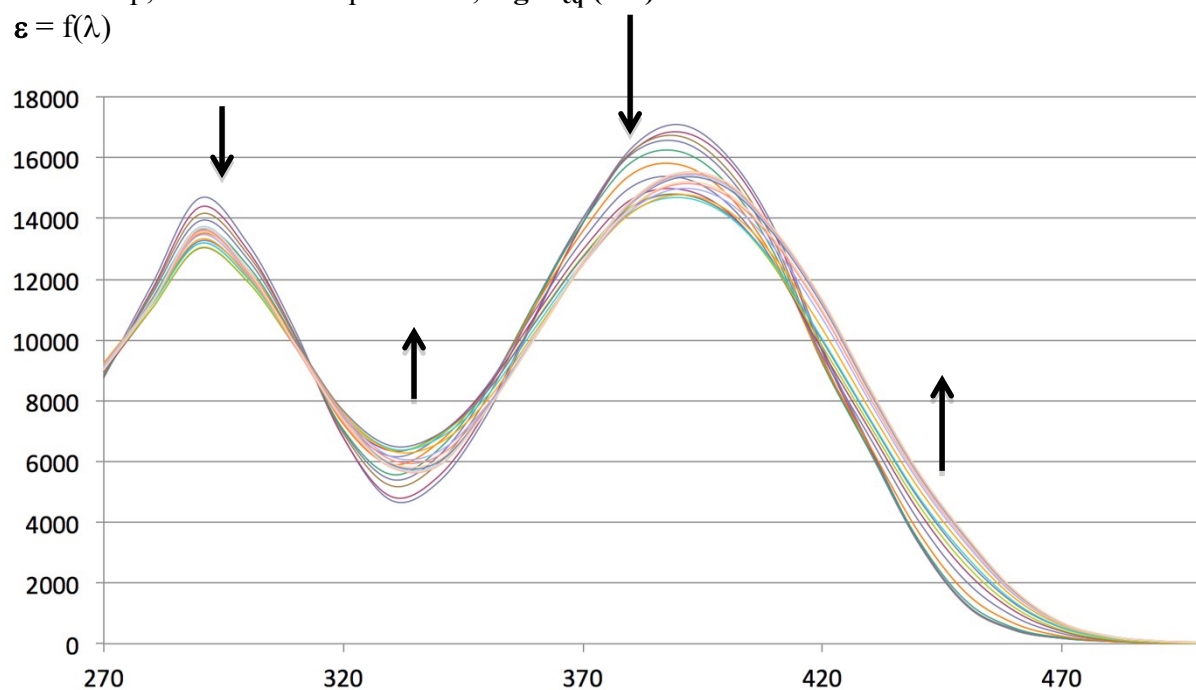



**4e) UV-Vis. Titration between 2b and  $n\text{-Bu}_4\text{N}^+ \cdot \text{CN}^-$**

Host: 1 eq.; Guest: 0–17 equivalents;  $\log K_{\text{eq}} (1:1) = 4.6607 \pm 0.1015$

$\epsilon = f(\lambda)$

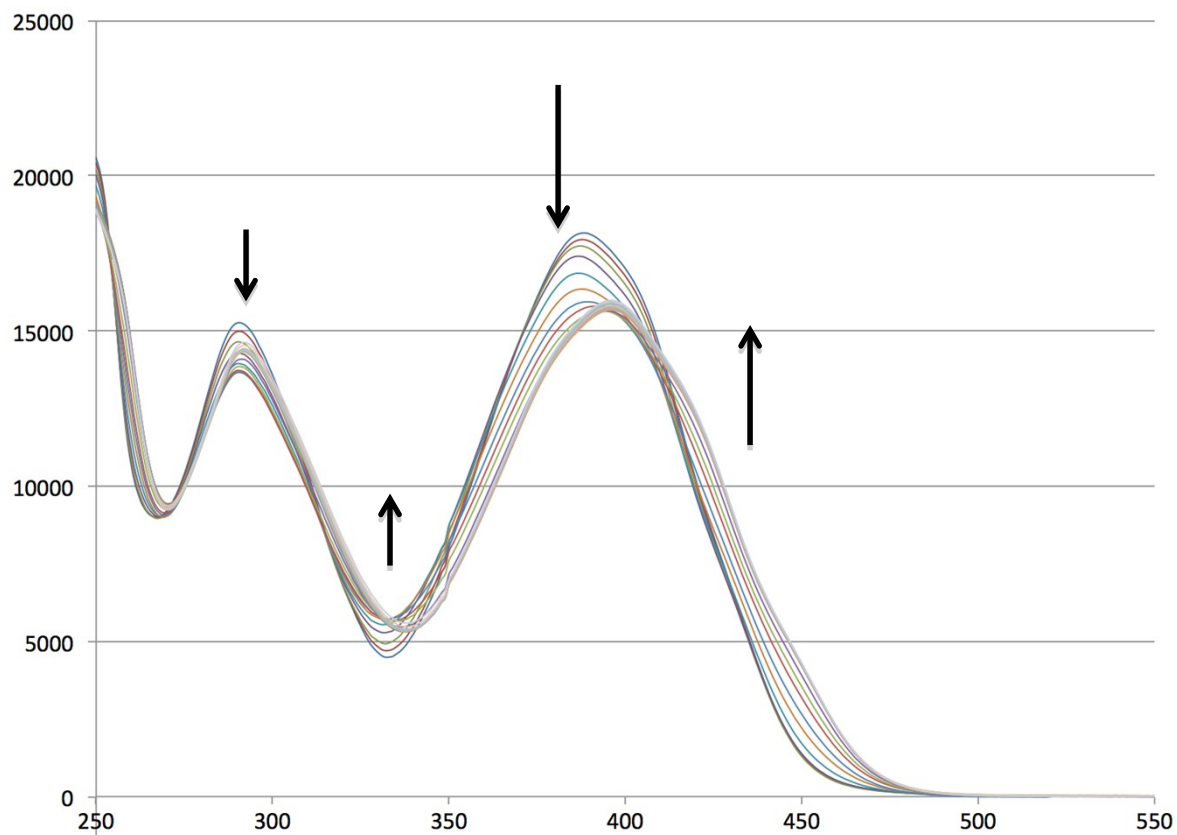

**4f) UV-Vis. Titration between 2b and  $n\text{-Bu}_4\text{N}^+ \cdot \text{F}^-$**

Host: 1 eq.; Guest: 0–40 equivalents;  $\log K_1 = 3.4406 \pm 0.0611$  and  $\log \beta = 8.5425 \pm 0.0379$

$\epsilon = f(\lambda)$

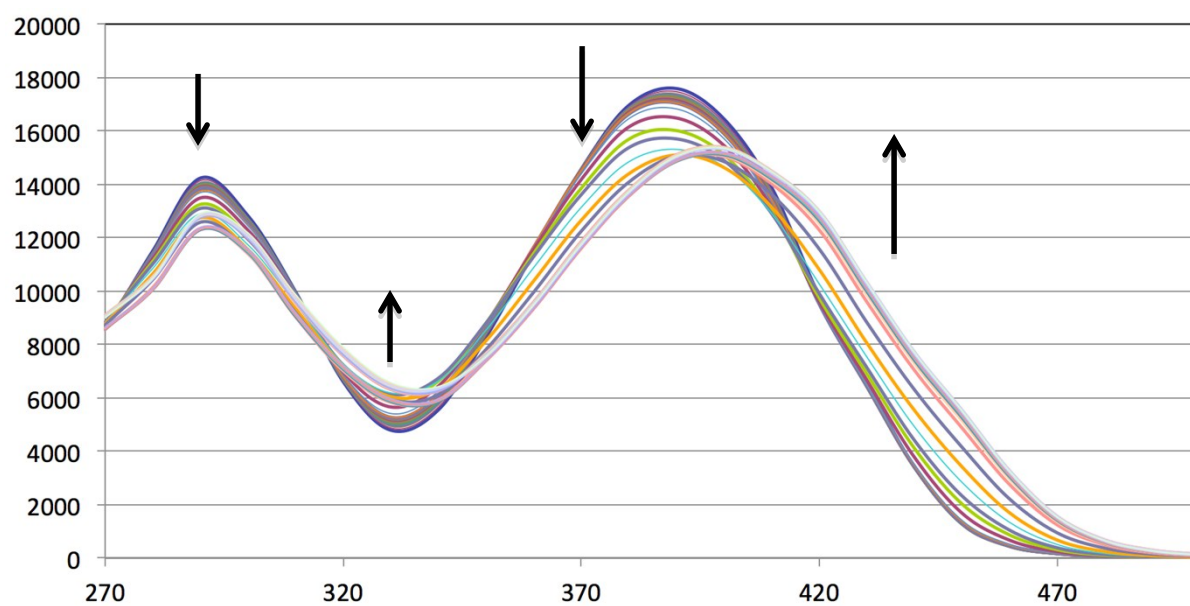

## <sup>1</sup>H NMR monitoring of compounds 1–2 in the presence of fluoride

**Procedure:** Deuterated solutions were freshly prepared. Acid-base reactions between (thio)amido-benzimidazoles **1–2** and *n*-tetrabutylammonium fluoride were monitored by <sup>1</sup>H NMR in CD<sub>3</sub>CN. A solution (100 μL) of host (~25 mM, CD<sub>3</sub>CN) was introduced in each NMR tube (5 experiments). Increasing aliquots of fluoride stock solution (~50 mM, CD<sub>3</sub>CN) were added and the total volume (500 μL) was adjusted with CD<sub>3</sub>CN.

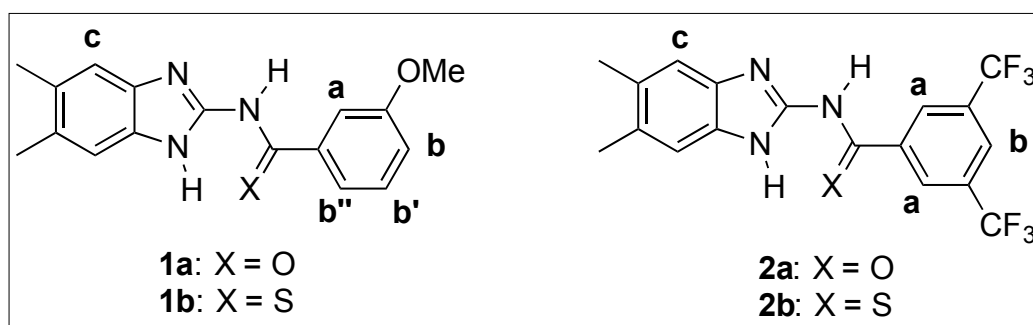

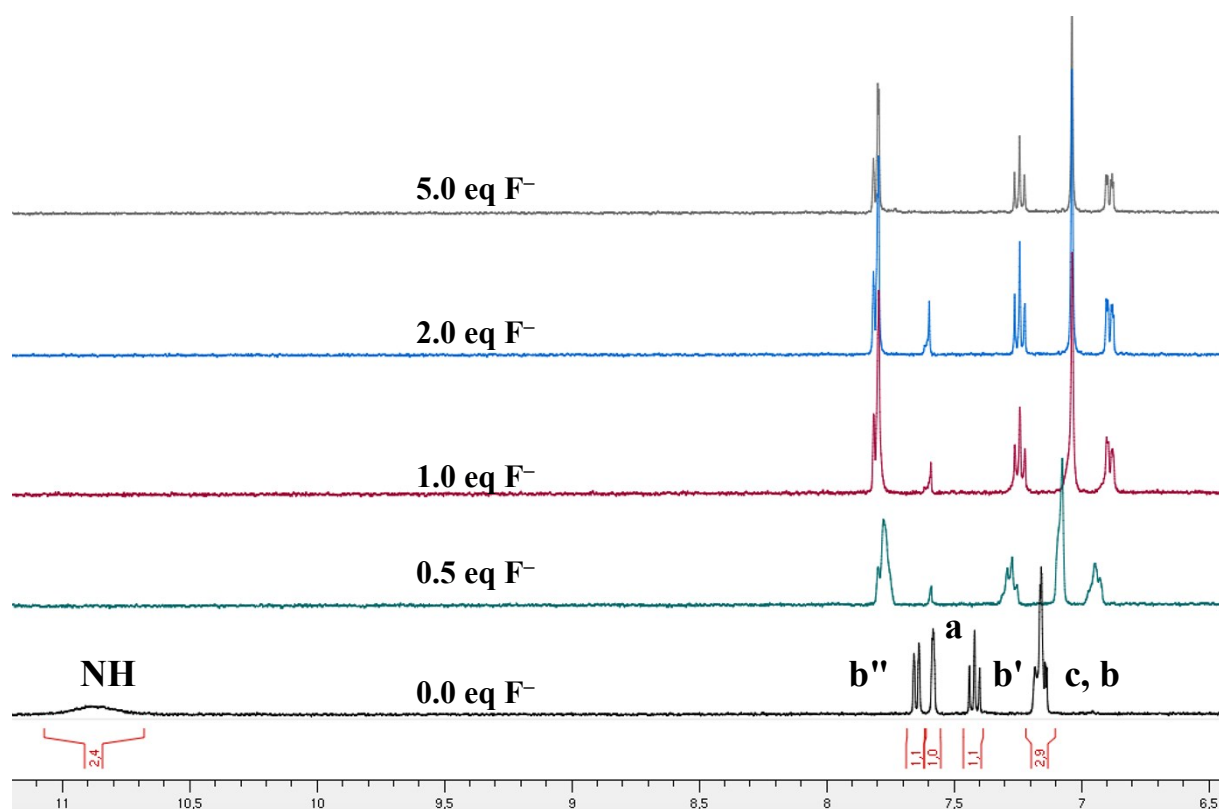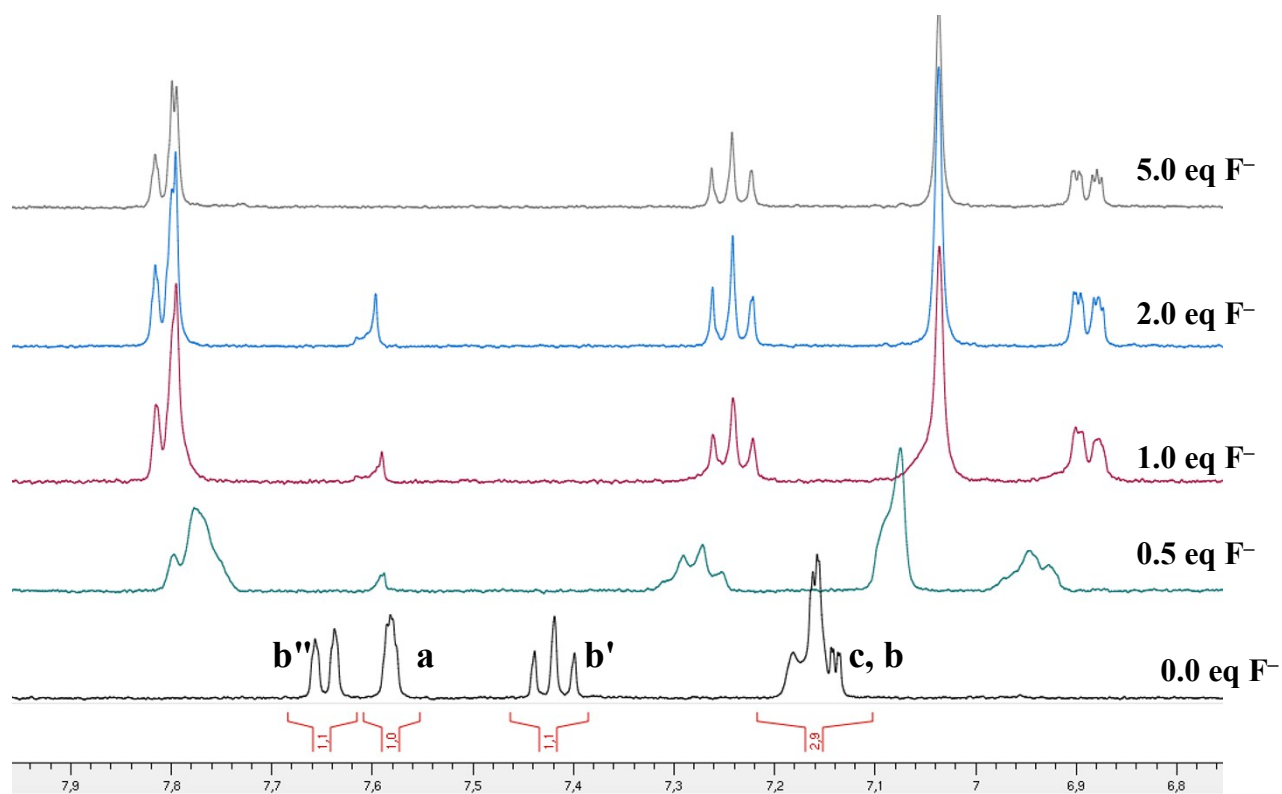

**Figure S1:**  $^1\text{H}$  NMR (400 MHz,  $\text{CD}_3\text{CN}$ , 298K) monitoring of reaction between **1a** (5 mM) and increasing amount of  $n\text{-Bu}_4\text{N}^+\text{F}^-$  (0, 0.5, 1, 2 and 5 equivalents). Top: spectra in the 11-7 ppm region showing the disappearance of the NH protons. Bottom: spectra in the aromatic region (8-6.5 ppm).

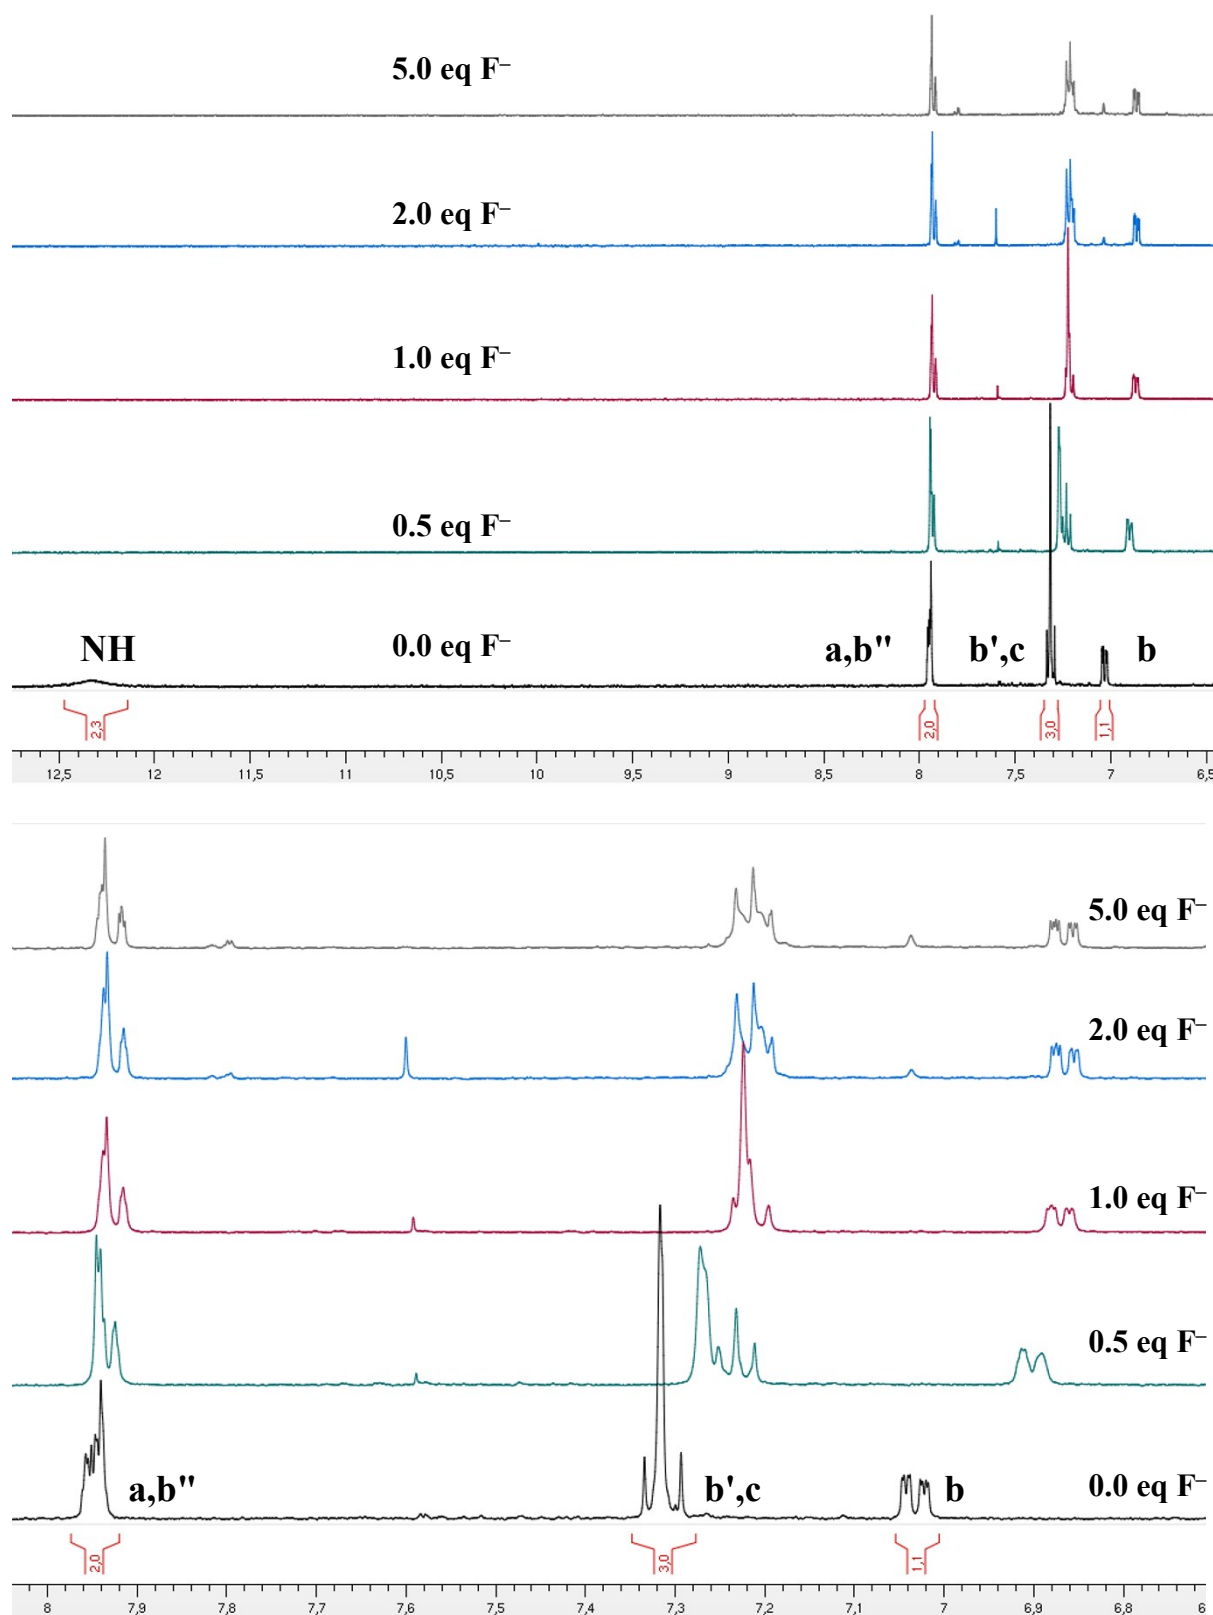

**Figure S2:**  $^1\text{H}$  NMR (400 MHz,  $\text{CD}_3\text{CN}$ , 298K) monitoring of reaction between **1b** (5 mM) and increasing amount of  $n\text{-Bu}_4\text{N}^+\text{F}^-$  (0, 0.5, 1, 2 and 5 equivalents). Top: spectra in the 13-6 ppm region showing the disappearance of the NH protons. Bottom: spectra in the aromatic region (8-6.5 ppm).

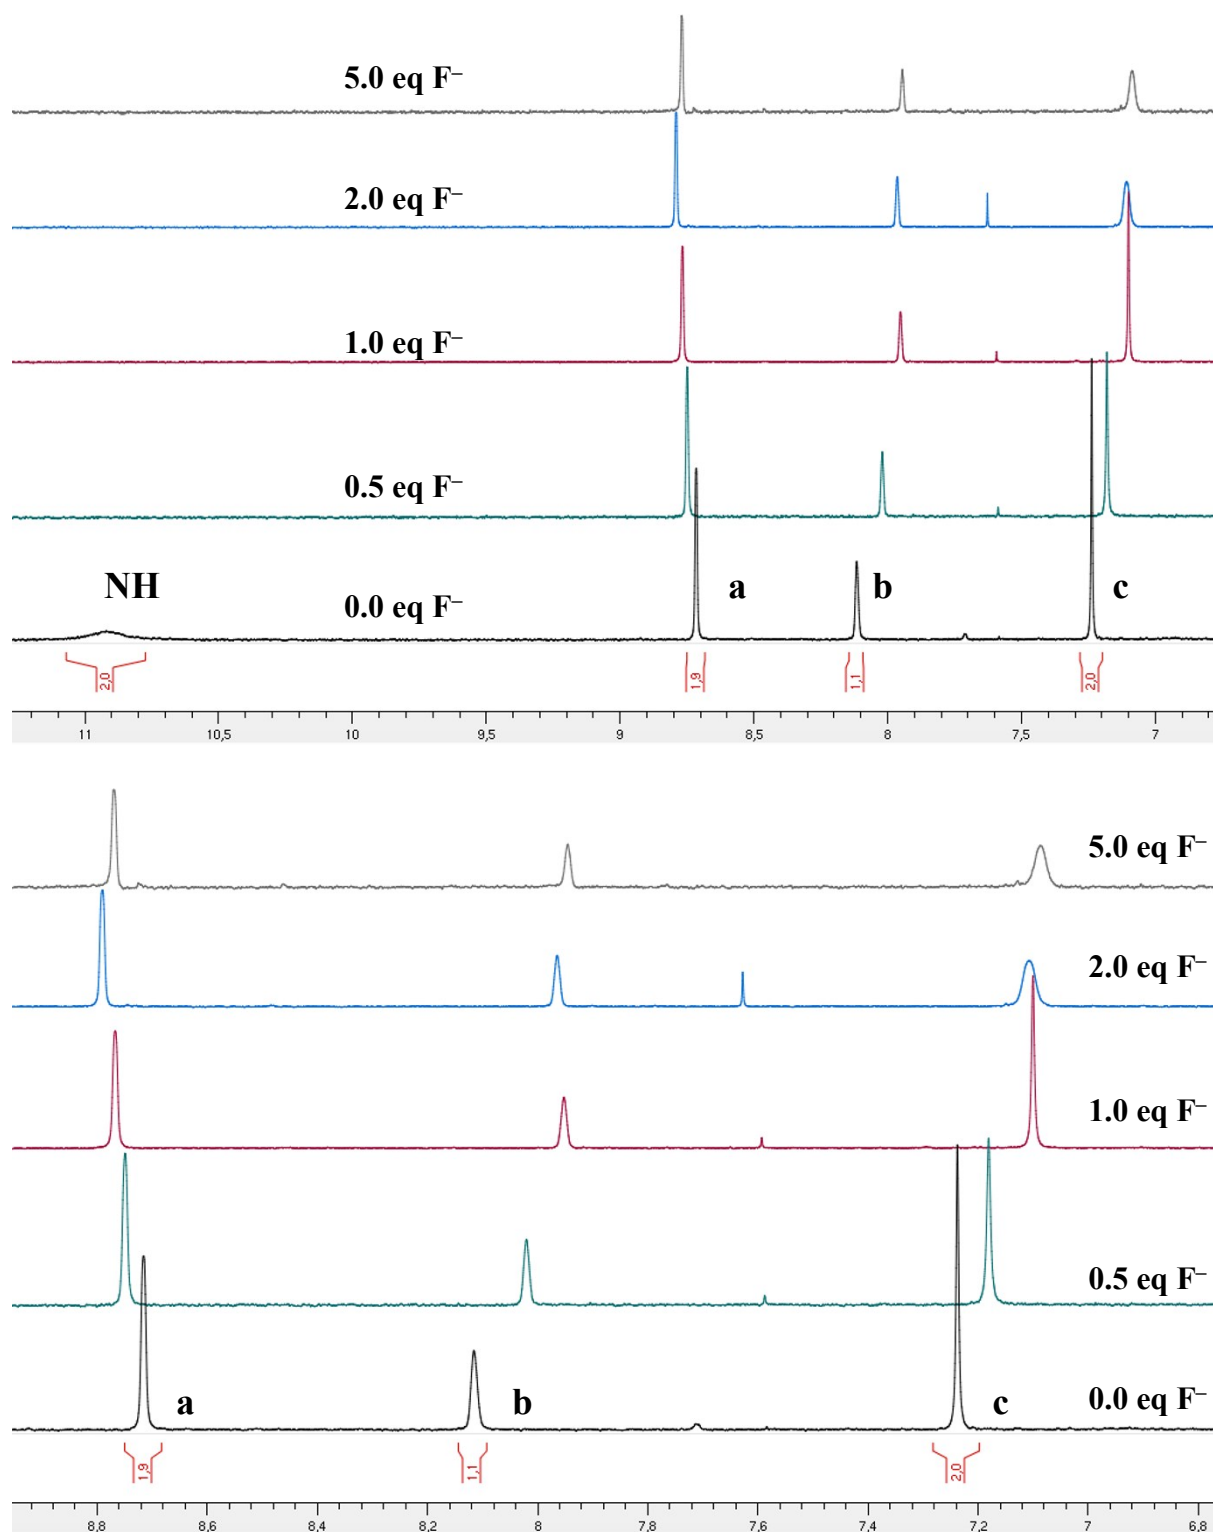

**Figure S3:** <sup>1</sup>H NMR (400 MHz, CD<sub>3</sub>CN, 298K) monitoring of reaction between **2a** (5 mM) and increasing amount of *n*-Bu<sub>4</sub>N<sup>+</sup>.F<sup>-</sup> (0, 0.5, 1, 2 and 5 equivalents). Top: spectra in the 11-7 ppm region showing the disappearance of the NH protons. Bottom: spectra in the aromatic region (9-7 ppm).

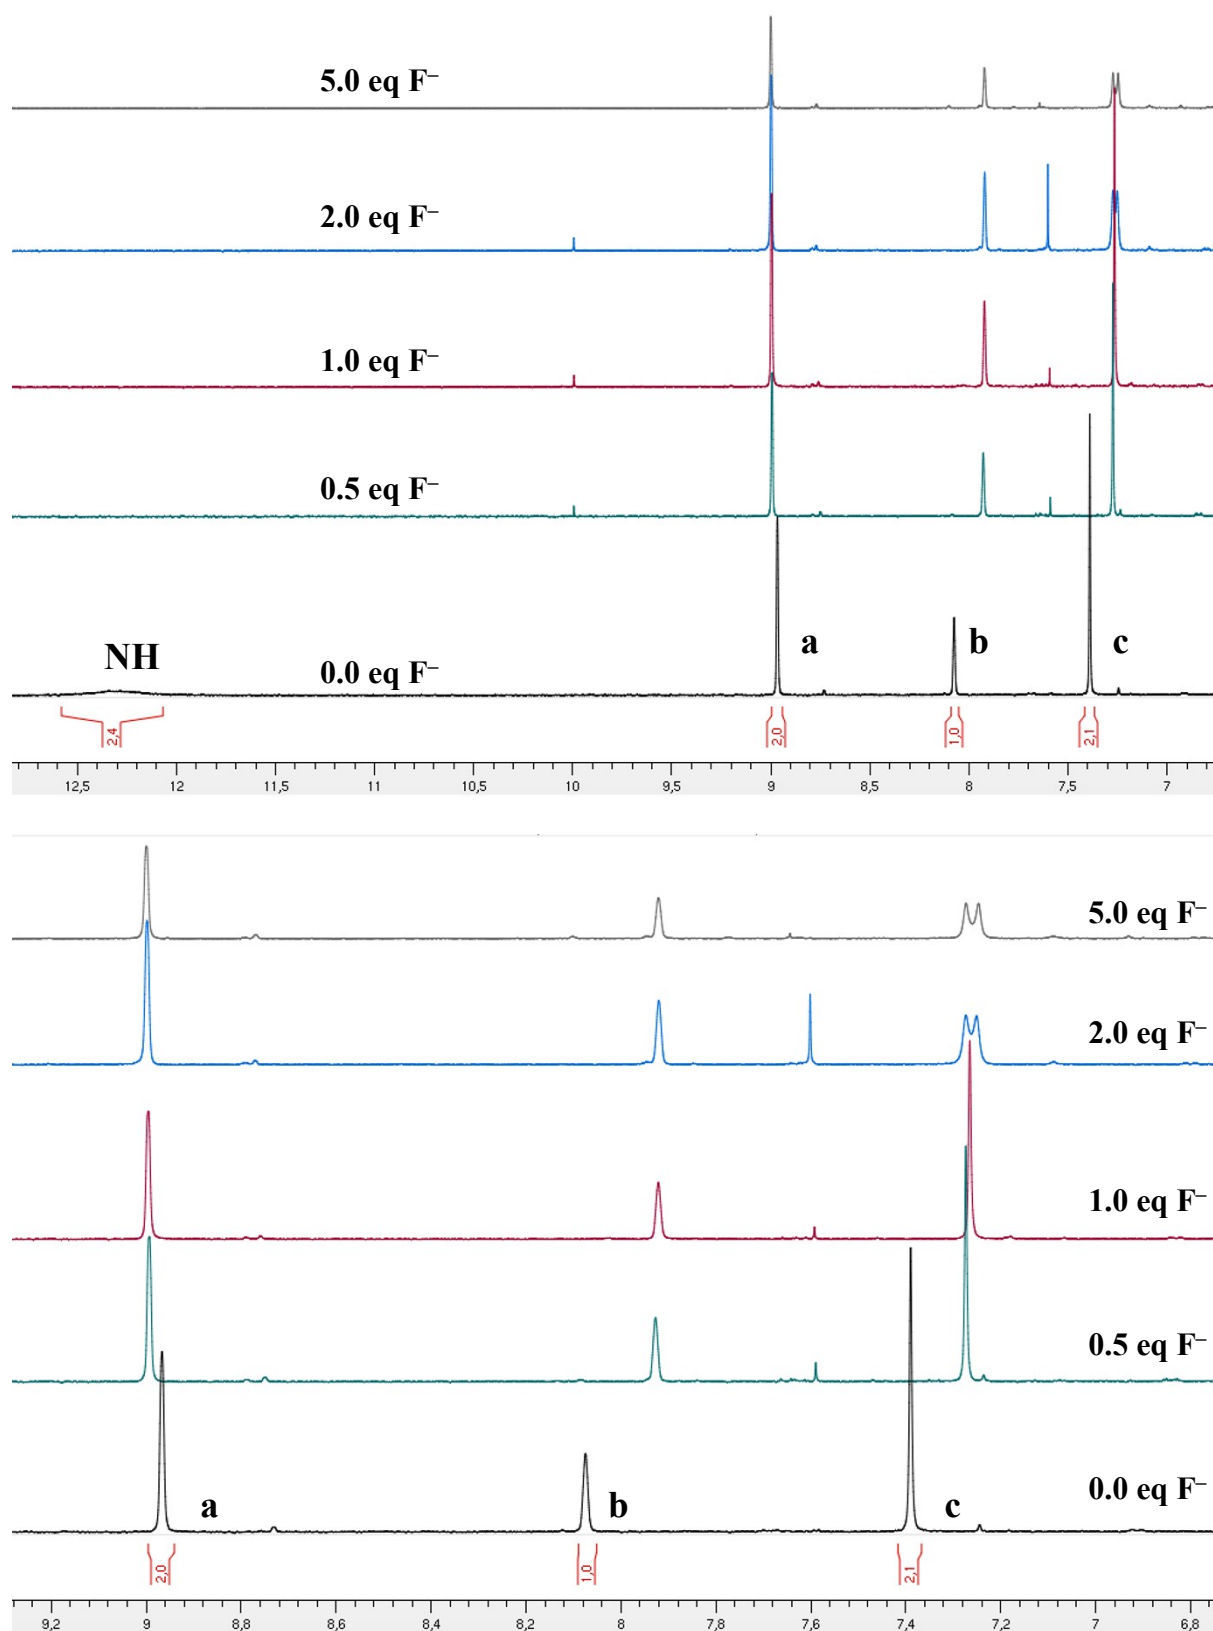

**Figure S4:**  $^1\text{H}$  NMR (400 MHz,  $\text{CD}_3\text{CN}$ , 298K) monitoring of reaction between **2b** (5 mM) and increasing amount of  $n\text{-Bu}_4\text{N}^+.\text{F}^-$  (0, 0.5, 1, 2 and 5 equivalents): (Top) spectra in the 13-7 ppm region, (bottom) spectra in the aromatic region (9-7 ppm).

## References

1. CrystalClear-SM Expert 2.1 (Rigaku, Jun 7<sup>th</sup> **2013**) Software, Version 5.6.2.0, Tokyo, Japan.
2. G. M. Sheldrick, *Acta Cryst.* **2008**, A64, 112-122.
3. L. J. Farrugia, *J. Appl. Cryst.* **1999**, 32, 837-838
4. S. Koeller, J. Kadota, F. Peruch, A. Deffieux, N. Pinaud, I. Pianet, S. Massip, J.-M. Léger, J.-P. Desvergne, B. Bibal, *Chem. Eur. J.* **2010**, 16, 4196-4205.
5. a) L. G. Sillen and B. Warnquist, *Ark. Kemi.* **1968**, 31, 315-339; b) L. G. Sillen and B. Warnquist, *Ark. Kemi.* **1968**, 31, 377-390; c) J. Havel, Haltafalspefo program, Masaryk University, Brno, Moravia, Czech Republic.
